# Supplementary material
Source: Royal Society of Chemistry journal article supplement (doi:10.1039/d6ob00679e)
Supplement: d6ob00679e1.pdf [file d6ob00679e1.pdf]

*Supporting Information*

**Substituent Effects on Photoresponsive Nitric Oxide Release by  
N-Nitrosoaniline Derivatives**

Haruka Tsuchiya<sup>a</sup>, Osuke Yoshikawa<sup>b</sup>, Mei Harada<sup>a</sup>, Mikako Ogawa<sup>a,c</sup>, Yuhei Ohta<sup>b</sup>,  
Hidehiko Nakagawa<sup>b</sup> and Naoya Ieda<sup>a\*</sup>

<sup>a</sup>Graduate School of Pharmaceutical Sciences, Hokkaido University; N12 W6, Kita-ku  
Sapporo, Hokkaido, 060-0812, Japan: <sup>b</sup>Graduate School of Pharmaceutical Sciences,  
Nagoya City University; 3-1, Tanabe-dori, Mizuho-ku, Nagoya, Aichi, 467-8603,  
Japan: <sup>c</sup>WPI-ICReDD, Hokkaido University; N21 W10, Kita-ku, Sapporo, Hokkaido,  
001-0021, Japan

**Contents**

1. Supporting Figures and Tables
2. NMR charts of **2–13**
3. Cartesian Coordinates

\* Correspondence e-mail: [ieda@pharm.hokudai.ac.jp](mailto:ieda@pharm.hokudai.ac.jp)

1. Supporting Figures and Tables

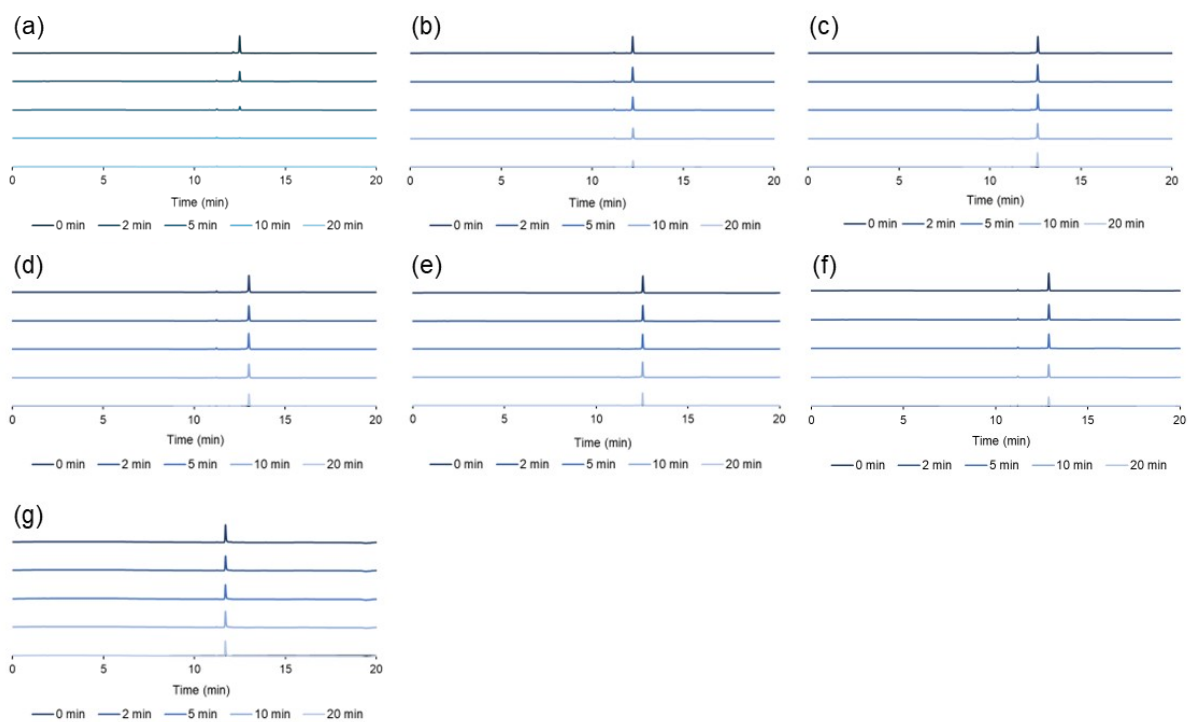

Figure S1 (a)–(g) Monitoring photodecomposition: chromatograms at 650 nm of solutions of **1** (a), **2** (b), **3**(c), **4** (d), **5** (e), **6** (f) and **7** (g) at various irradiation times.

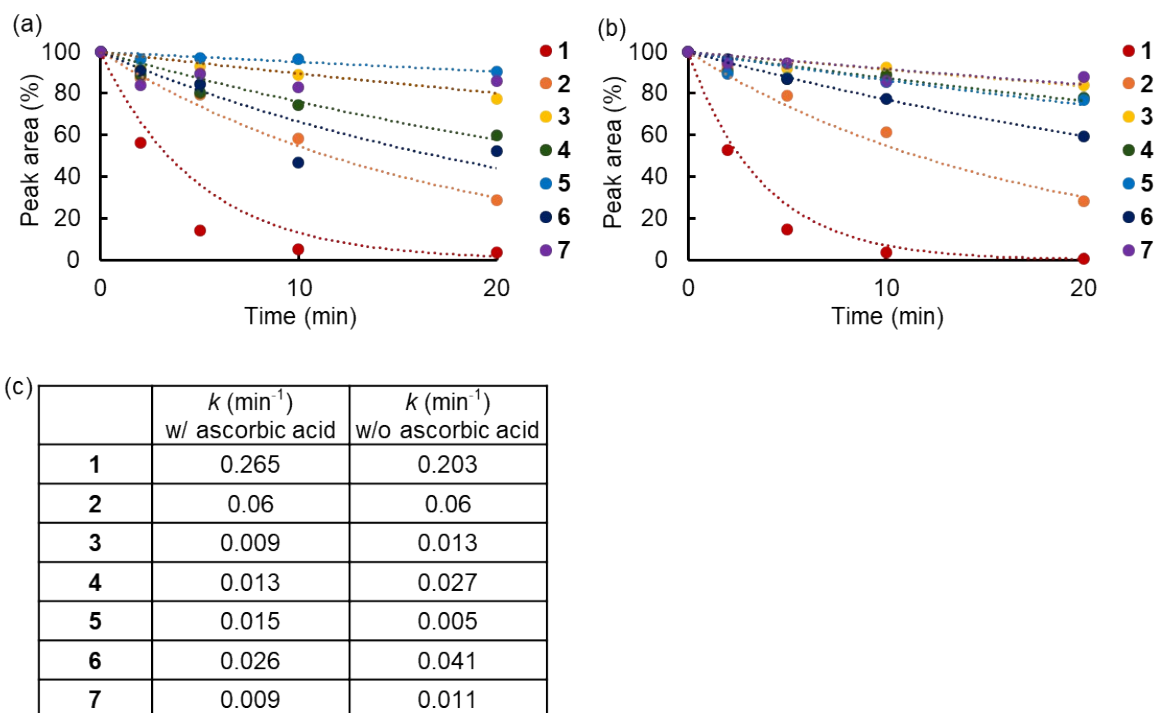

Figure S2 (a) Change of HPLC peak area of solutions of 1–8 with irradiation time in the presence of ascorbic acid. (b) Change of HPLC peak area of solutions of 1–8 with irradiation time in the absence of ascorbic acid. Each compound (10  $\mu\text{M}$ ) was dissolved in HEPES buffer (100 mM, pH 7.4, DMSO 0.1%). (c) Photodecomposition rate constants in the presence or absence of ascorbic acid.

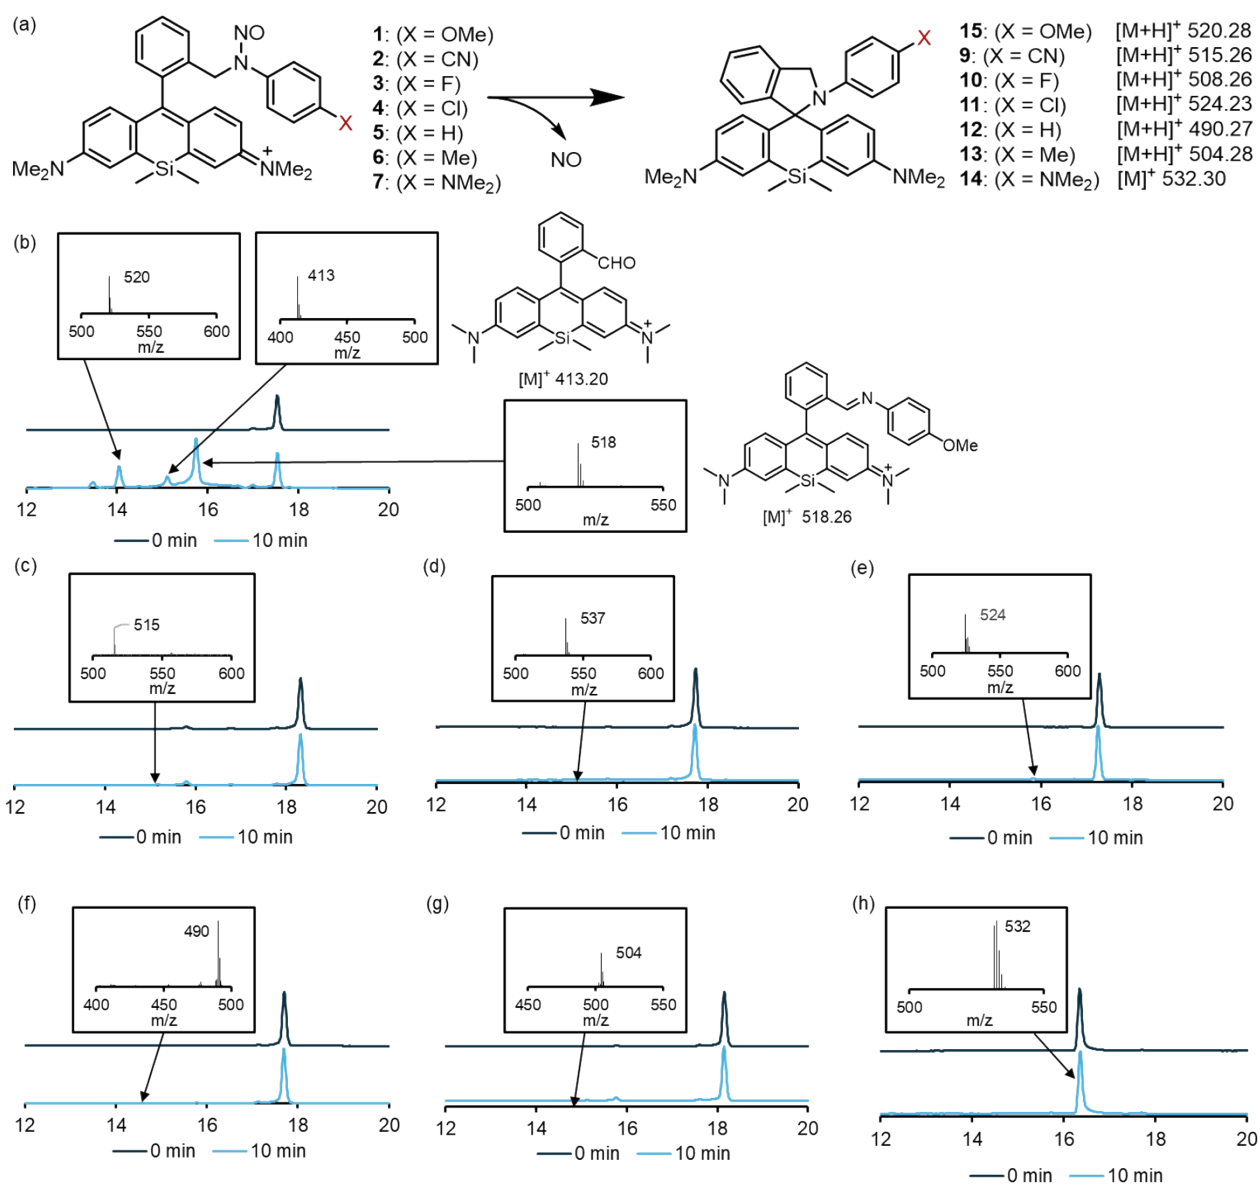

Figure S3 (a) Putative photodecomposition products of NORD-2 derivatives. (b)–(h) LC-MS charts of solutions of **1** (b), **2** (c), **3** (d), **4** (e), **5** (f), **6** (g), and **7** (h). Each compound (10 μM) was dissolved in HEPES buffer (100 mM, pH 7.4, DMSO 0.1%).

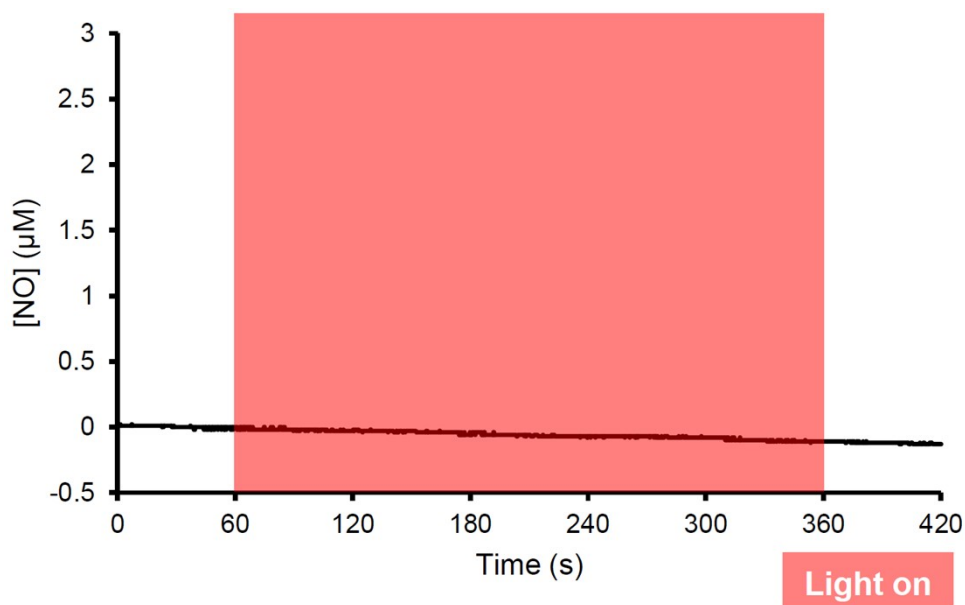

Figure S4. Effect of light irradiation on the NO electrode signal. NO electrode response of 100 mM HEPES buffer (pH 7.3) containing 0.1% DMSO in the absence of NO releasers. The sample was irradiated with 660 nm light at  $133 \text{ mW cm}^{-2}$  during the red shaded period. No increase in the NO signal was observed.

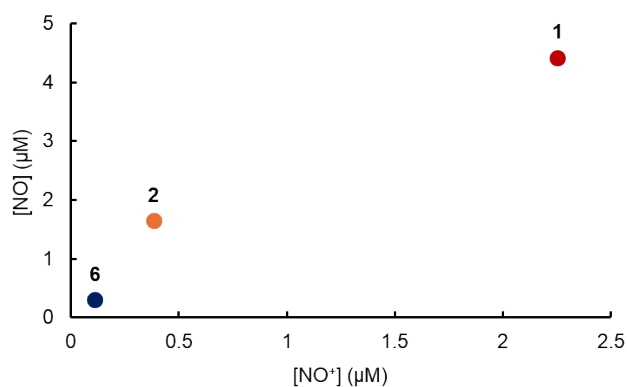

Figure S5 Comparison of amounts of NO and NO<sup>+</sup> released from **1**, **2** and **6**.

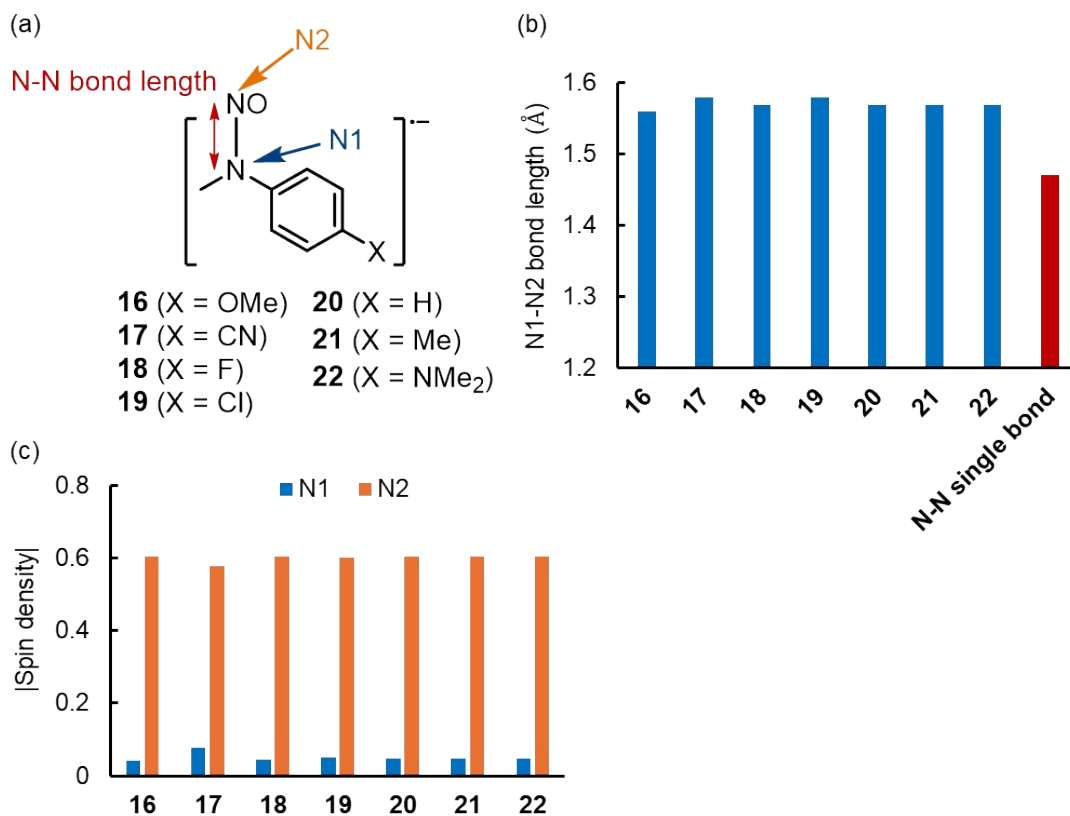

Figure S6 (a) Structures of model radical anion intermediates **16–22**. (b) N1-N2 bond lengths of **16–22**. The N–N single-bond length is based on the reported value for hydrazine.<sup>1</sup> (c) Spin densities of N1 and N2 in **16–22**. Calculations were conducted using U $\omega$ B97X-D/6-31G (d,p).

(a)

|                        | <b>1</b> | <b>2</b> | <b>3</b> | <b>4</b> | <b>5</b> | <b>6</b> | <b>7</b> |
|------------------------|----------|----------|----------|----------|----------|----------|----------|
| Excitation Energy [eV] | 2.74     | 2.57     | 2.57     | 2.58     | 2.58     | 2.58     | 2.72     |
| $\pi$ - $\pi^*$ [eV]   | 2.69     | 2.49     | 2.50     | 2.46     | 2.45     | 2.45     | 2.54     |
| CT-MECI [eV]           | 2.70     | 2.93     | 3.01     | 2.66     | 3.06     | 2.55     | 2.54     |
| CT [eV]                | 2.10     | 2.93     | 2.48     | 2.56     | 2.56     | 2.47     | 1.69     |

(b)

|              | <b>1</b> | <b>7</b> |
|--------------|----------|----------|
| GS-MECI [eV] | 3.20     | 2.28     |

Figure S7 (a) Energy of each excited state and CT-MECI of **1–7**. Calculations were conducted using  $\omega$ B97XD/6-31G (d,p). (b) GS-MECI of **1** and **7**.



## 2. NMR charts of 2–13

### $^1\text{H}$ NMR of 2

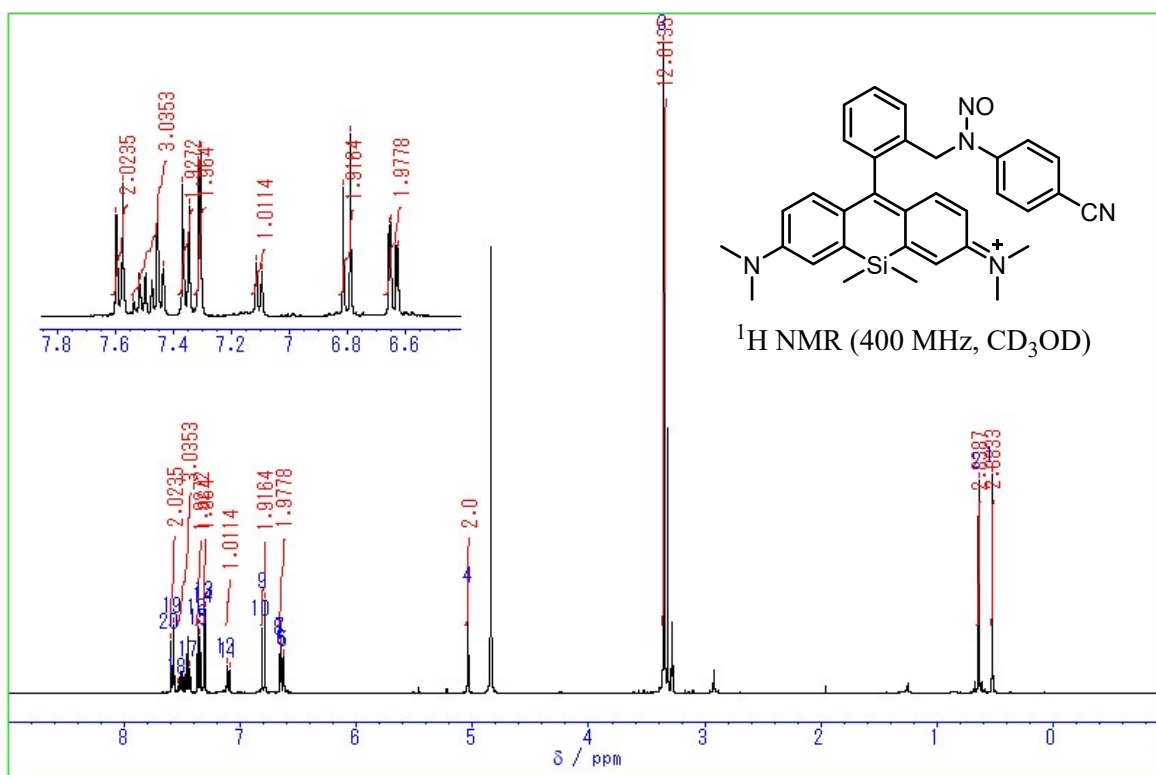

### $^{13}\text{C}$ NMR of 2

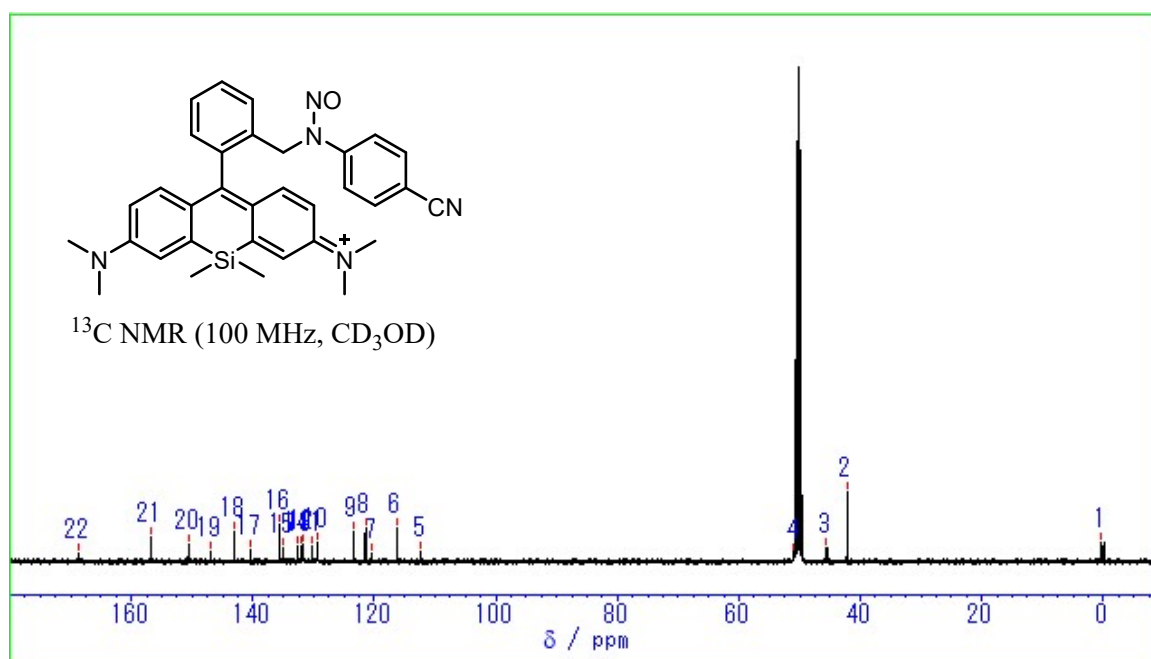

<sup>1</sup>H NMR of **3**

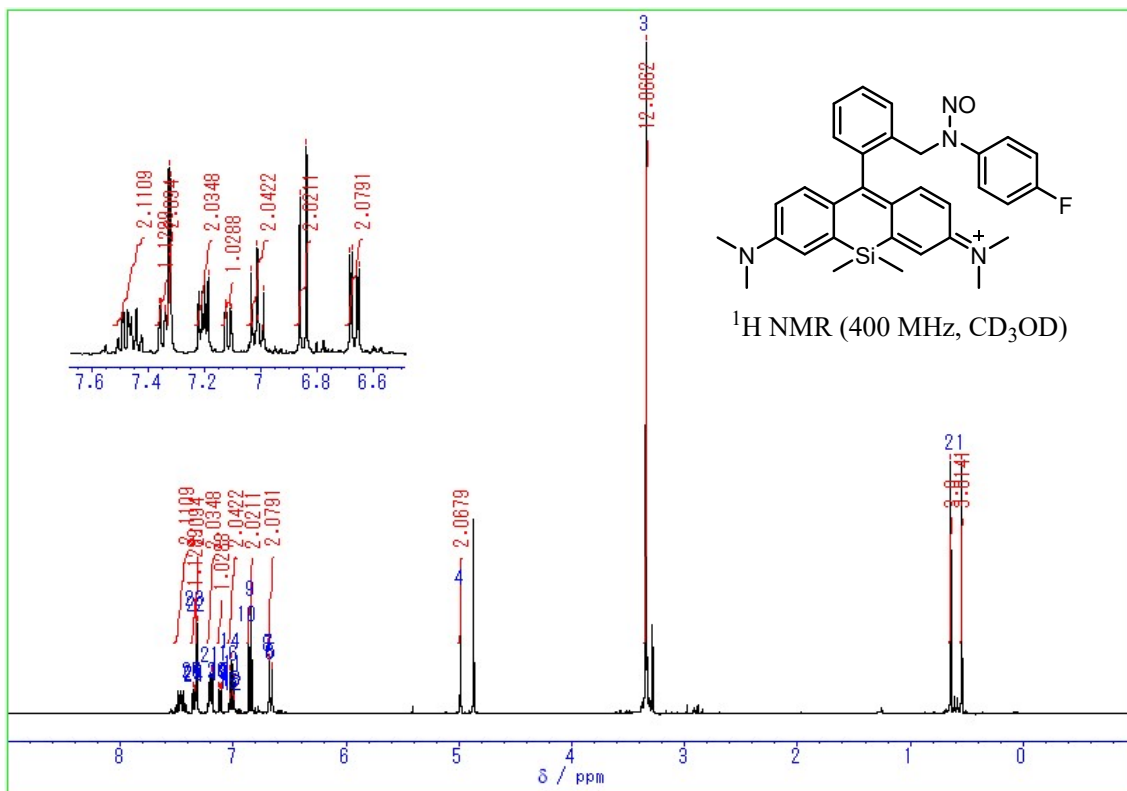

<sup>13</sup>C NMR of **3**

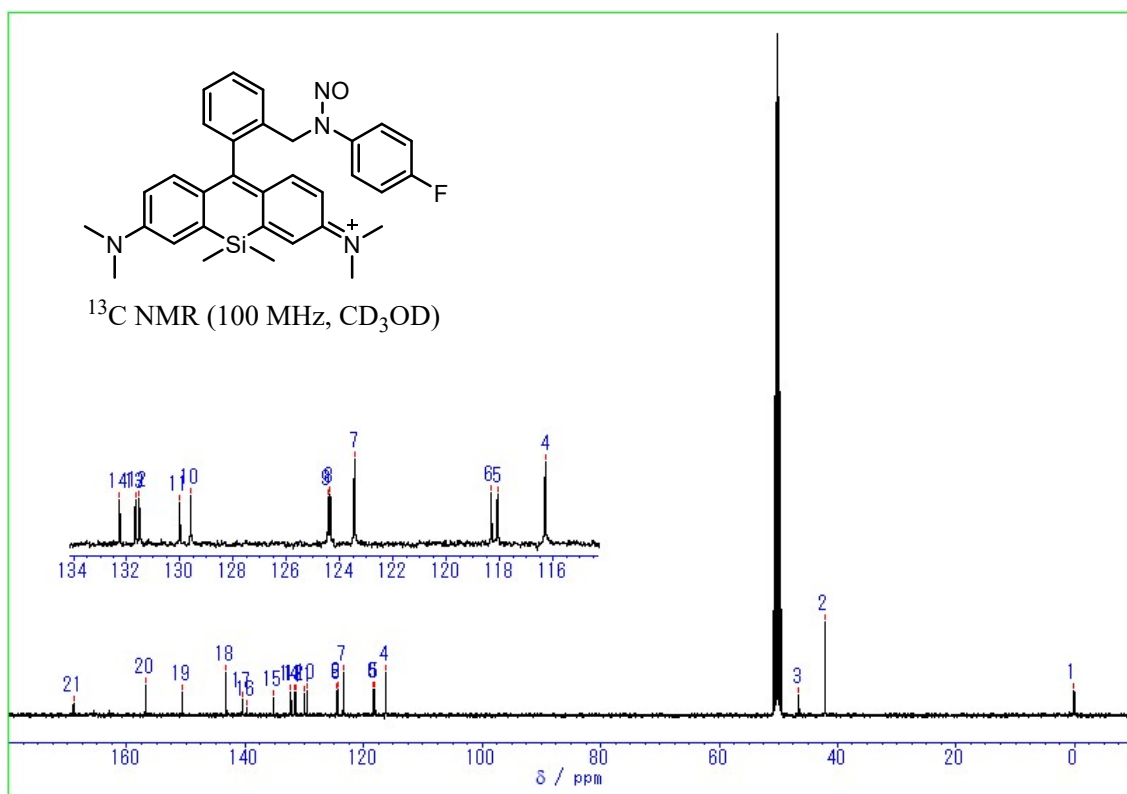

<sup>1</sup>H NMR of 4

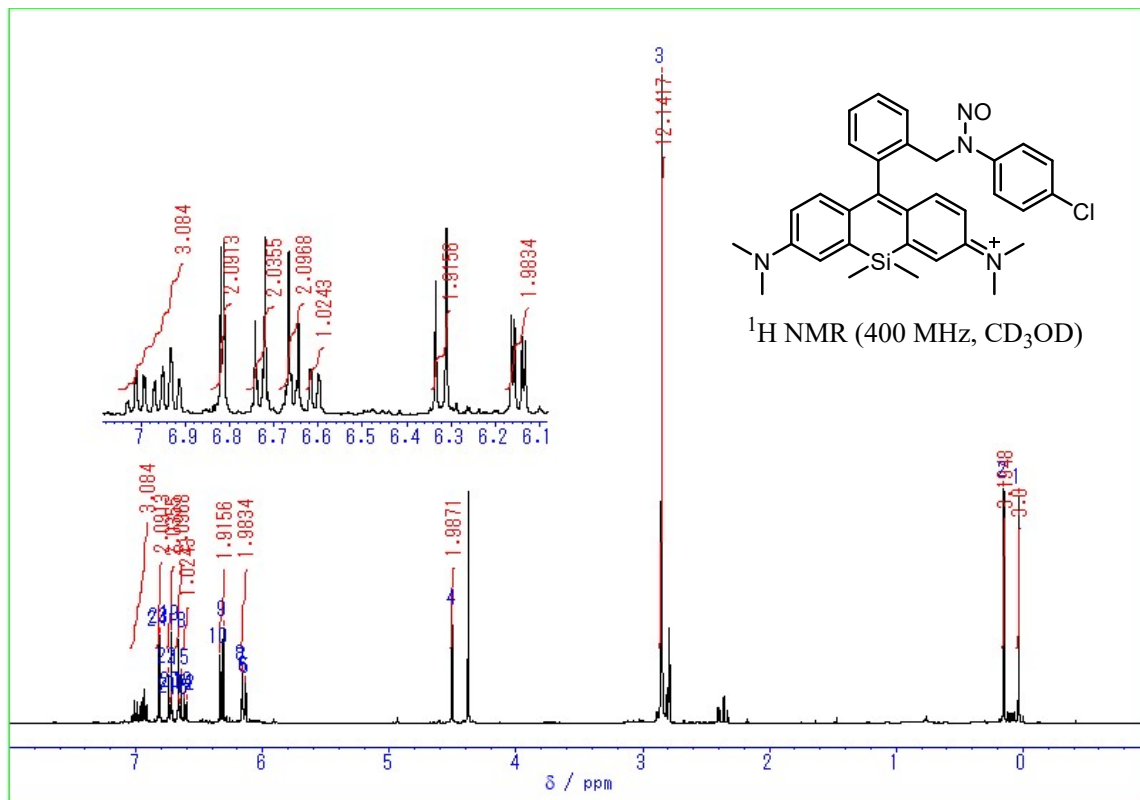

<sup>13</sup>C NMR of 4

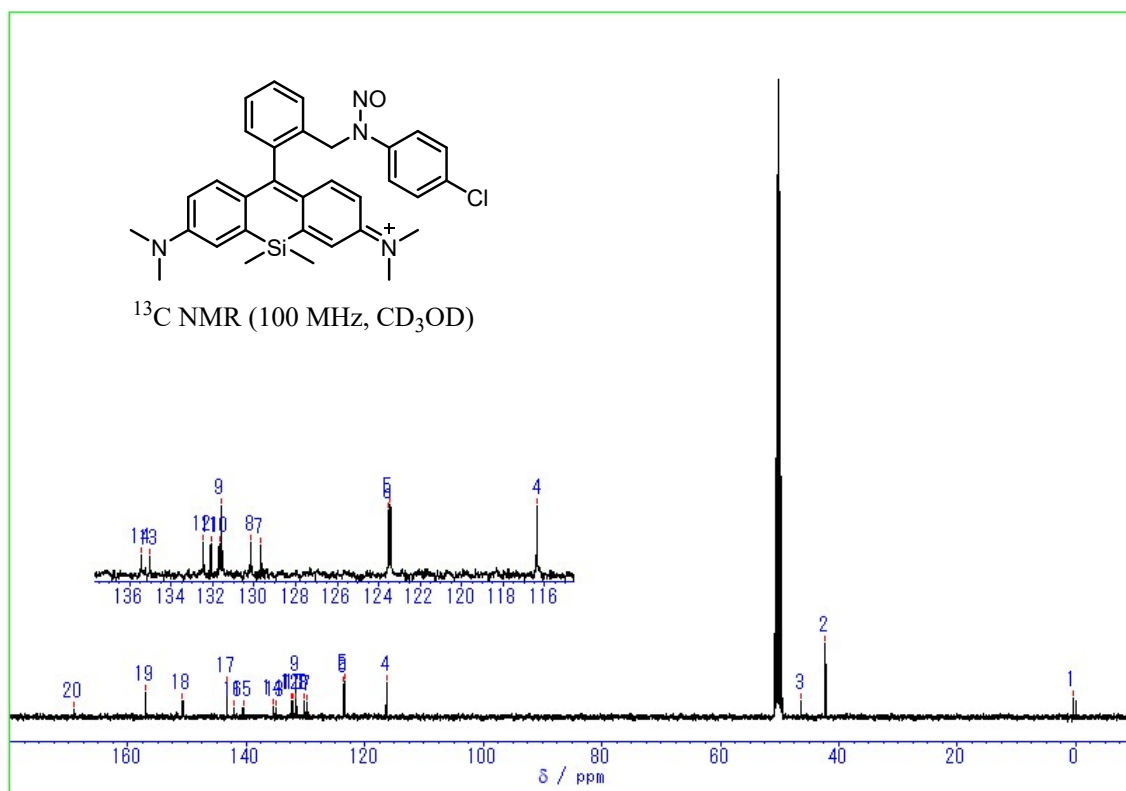



<sup>1</sup>H NMR of 6

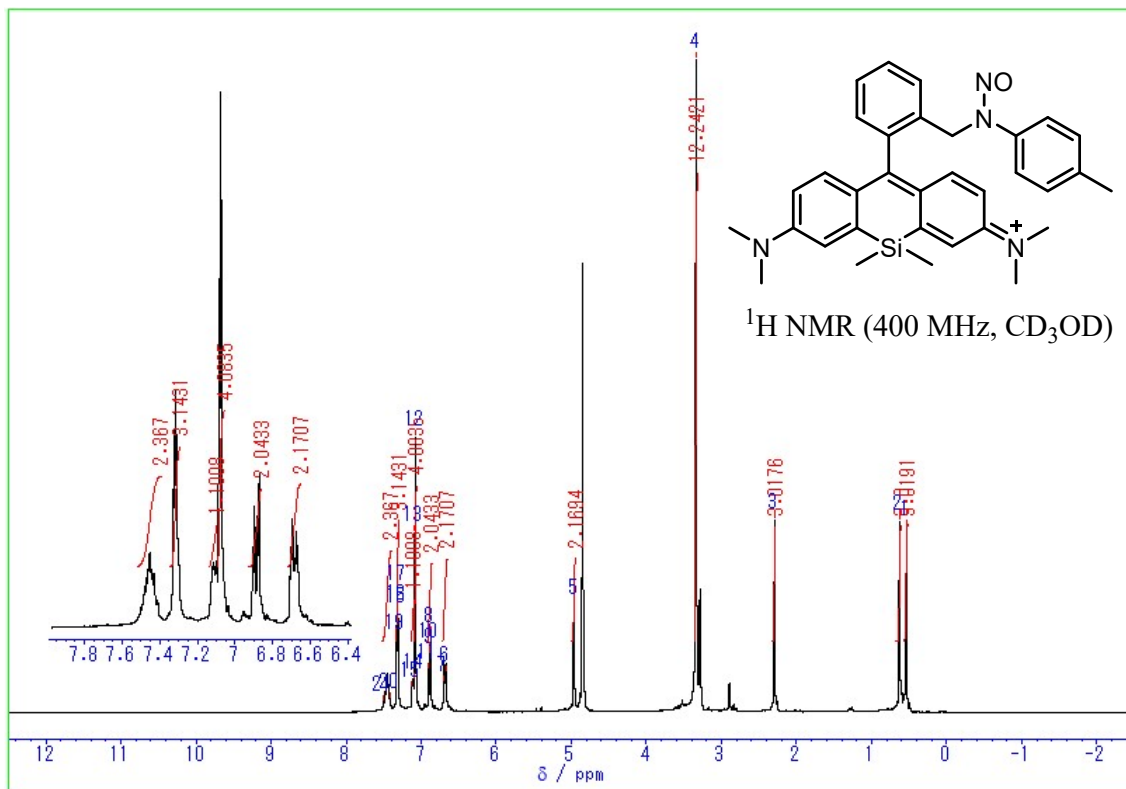

<sup>13</sup>C NMR of 6

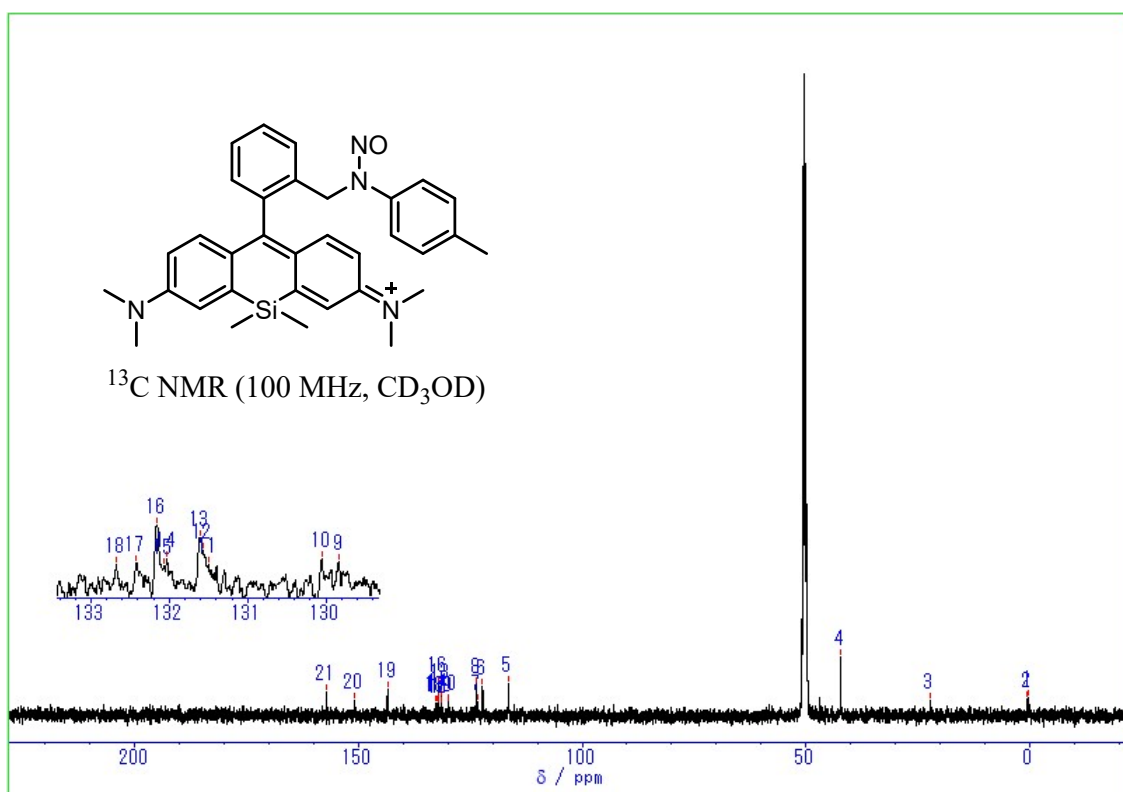



<sup>1</sup>H NMR of **9**

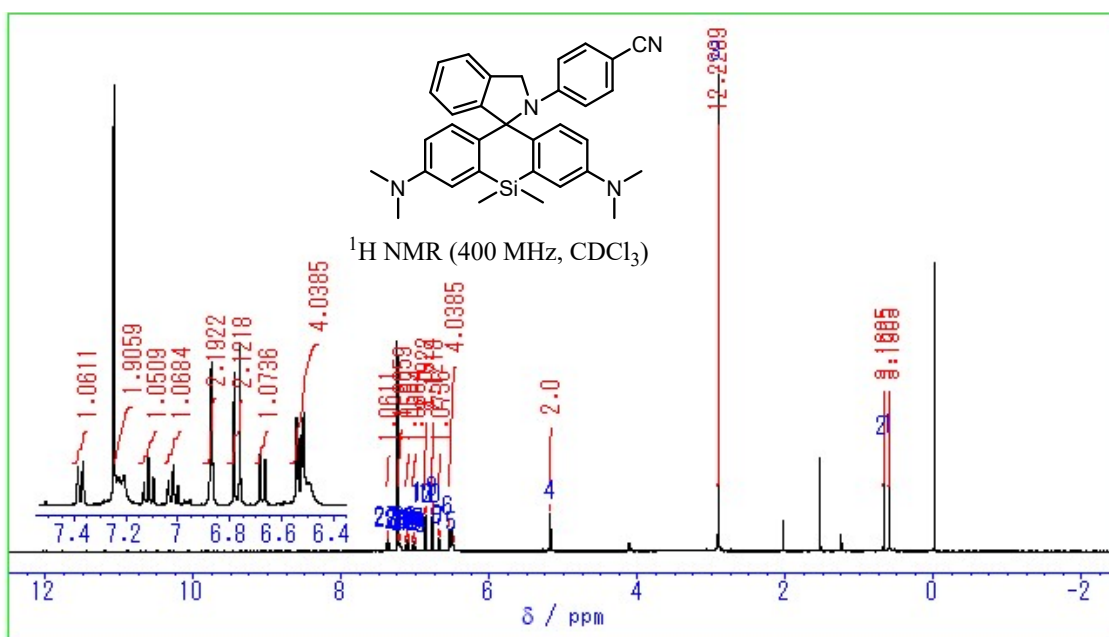

<sup>13</sup>C NMR of **9**

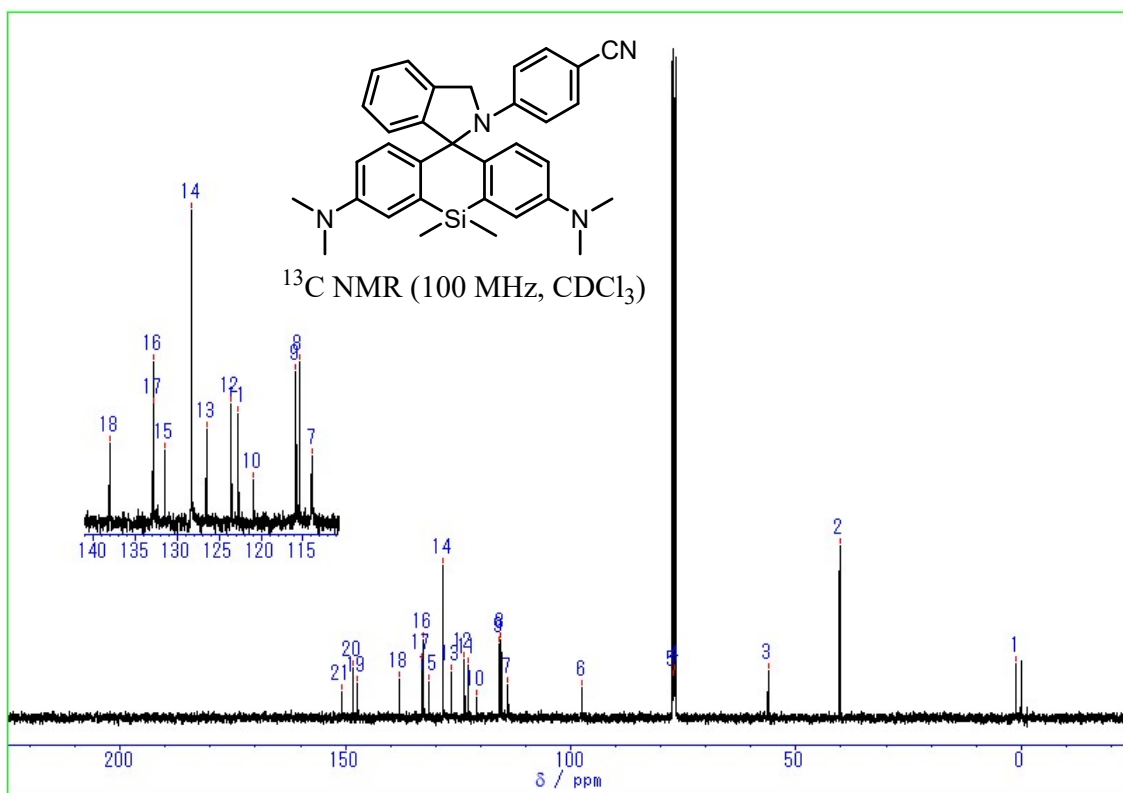



<sup>1</sup>H NMR of **11**

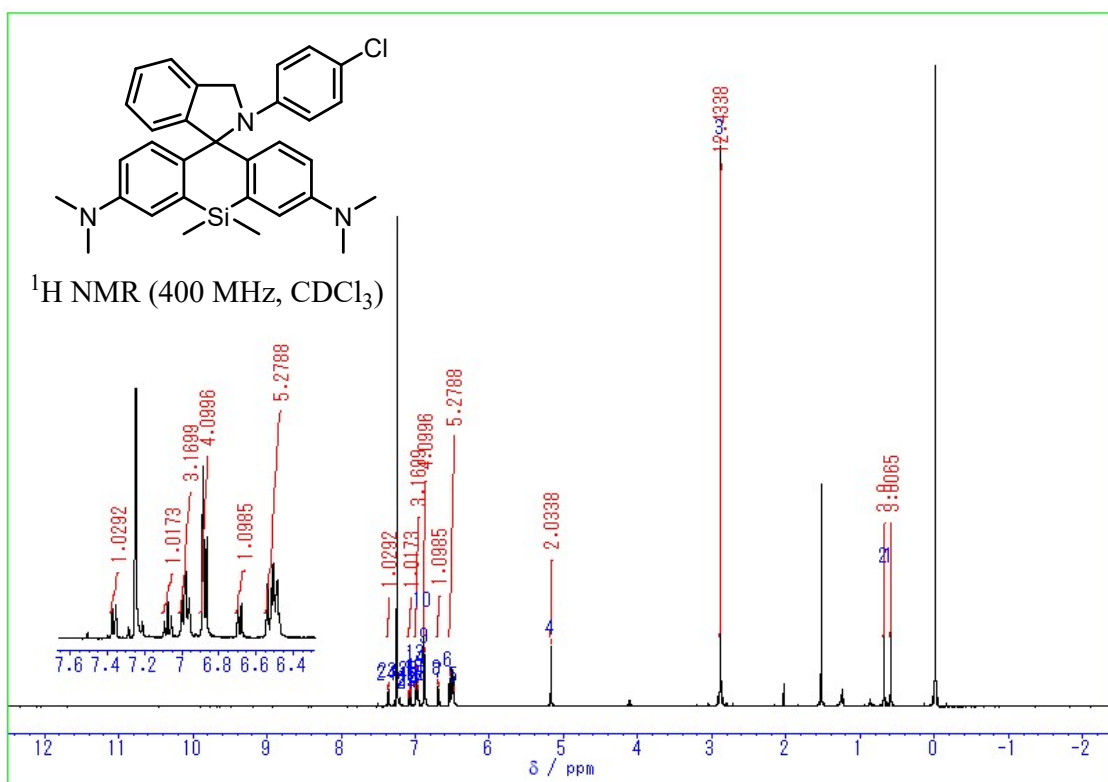

<sup>13</sup>C NMR of **11**

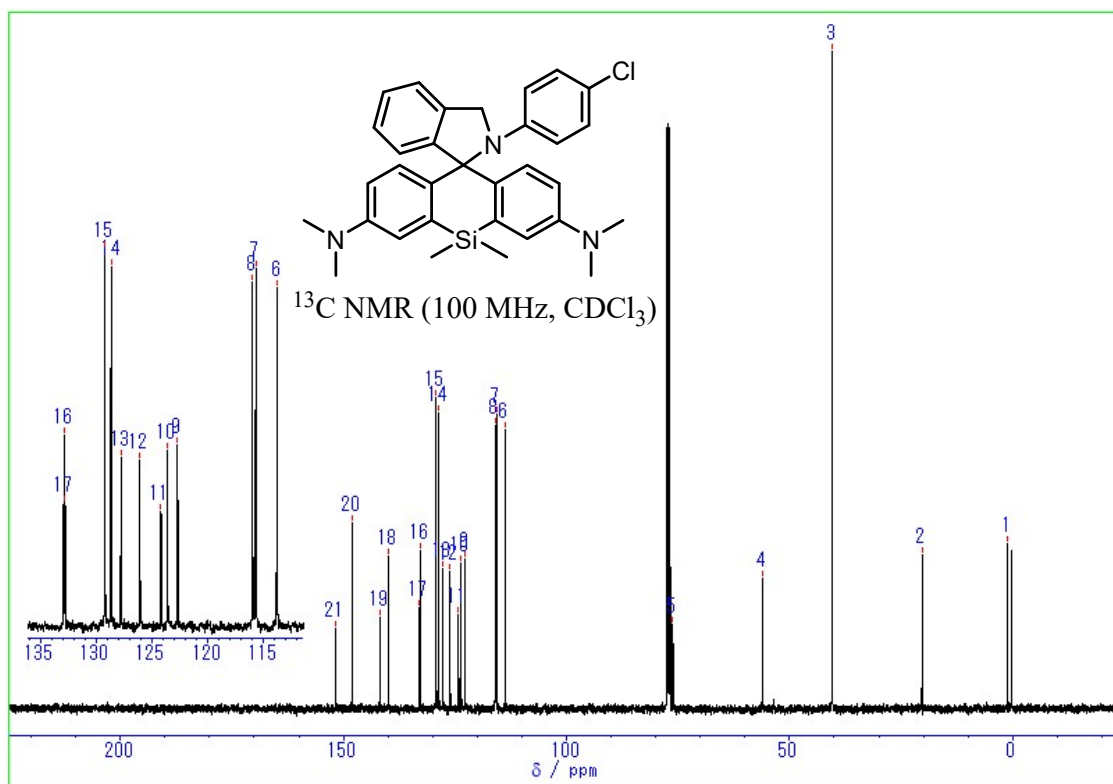

<sup>1</sup>H NMR of **12**

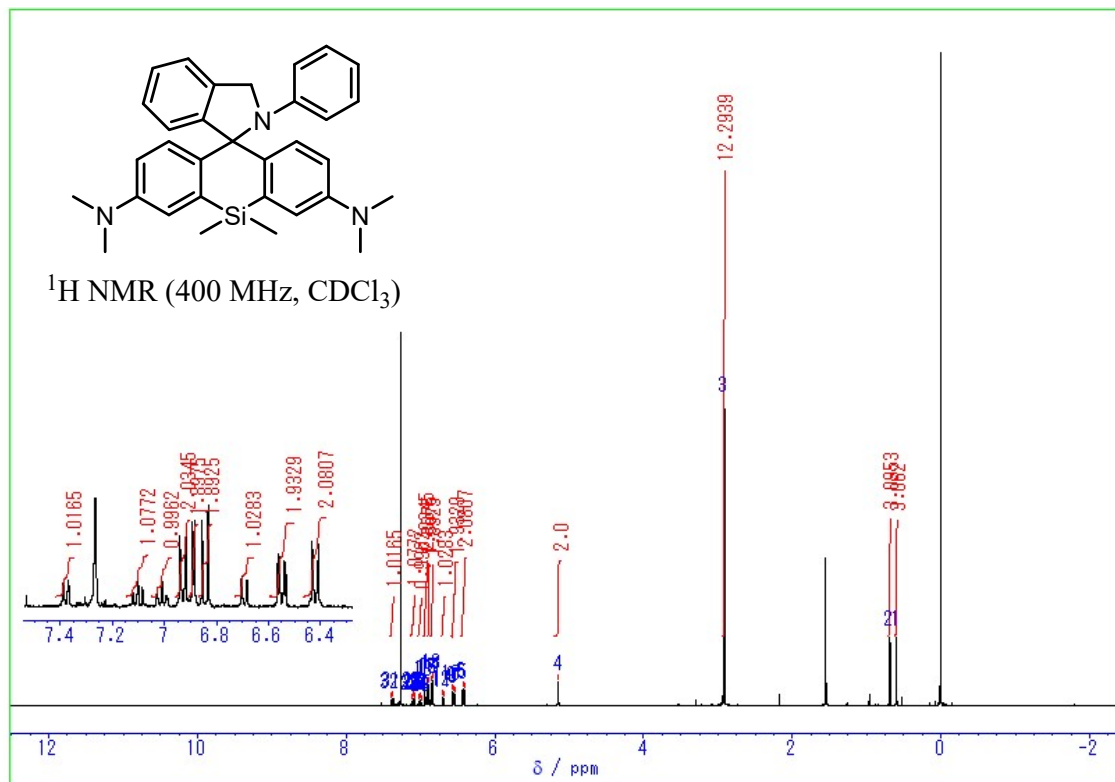

<sup>13</sup>C NMR of **12**

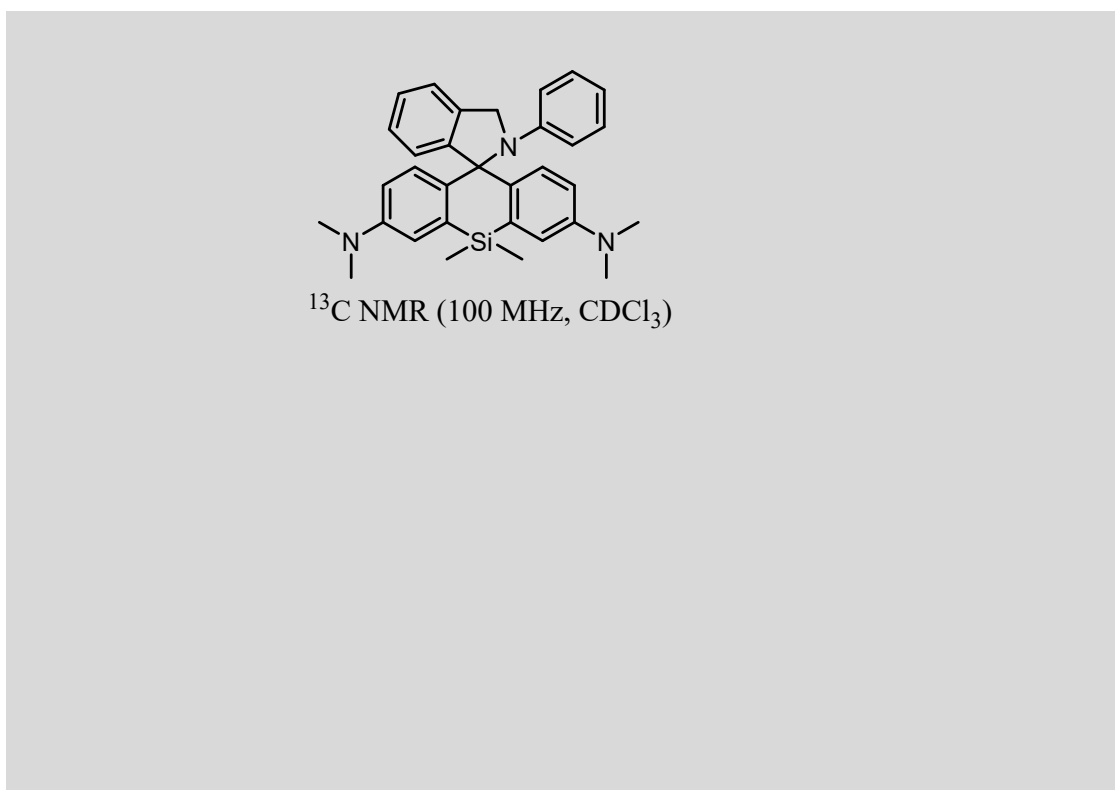

<sup>1</sup>H NMR of **13**

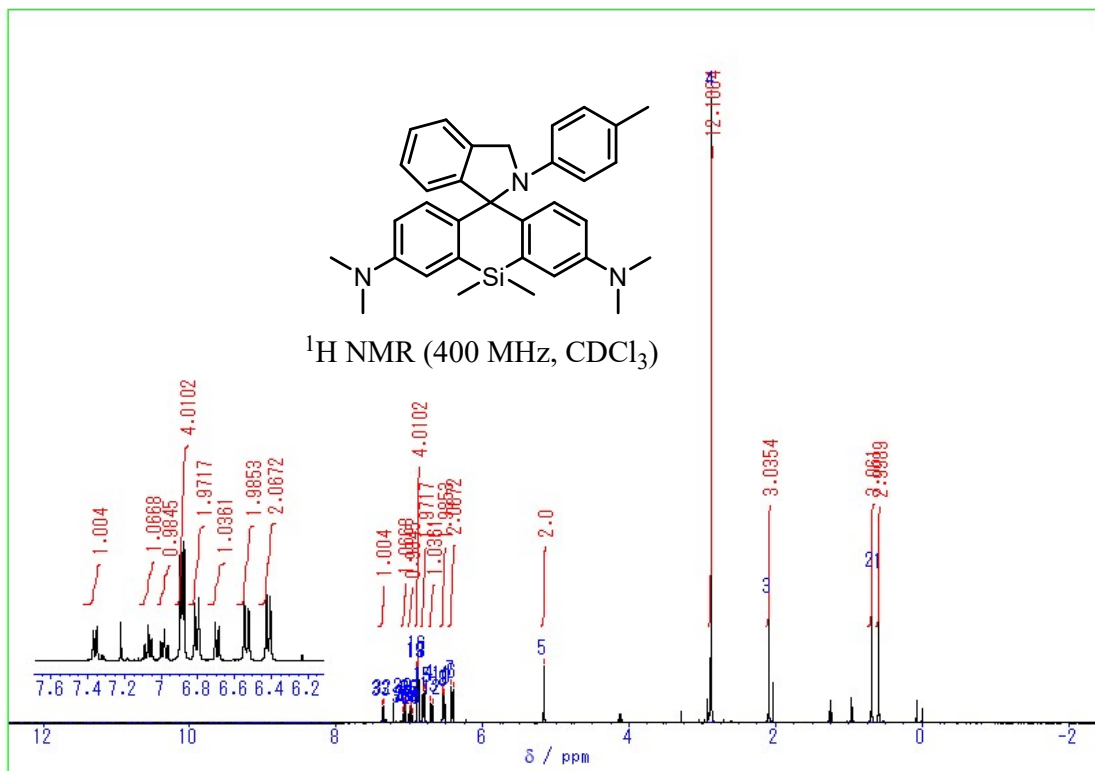

<sup>13</sup>C NMR of **13**

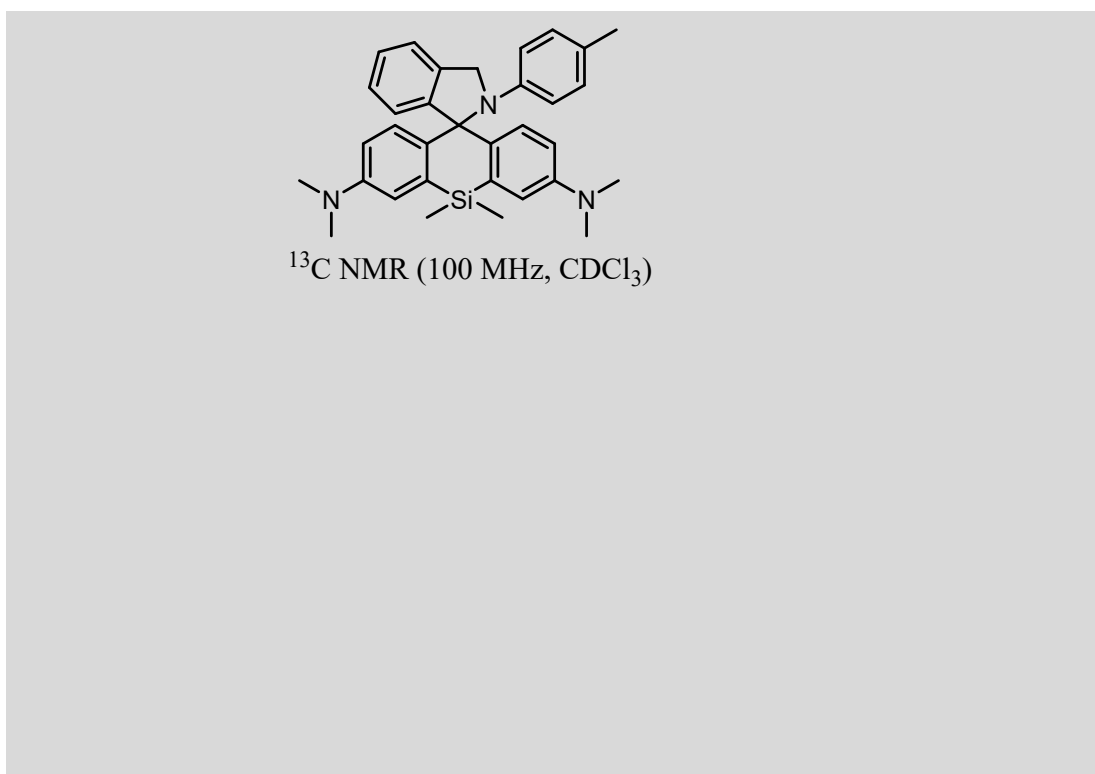

### 3. Cartesian Coordinates

#### 1 (Ground state)

Total Energy = -1938.0169181 A.U

```

-----
C    3.90517365    0.88540607   -1.37966584
C    2.98600863    1.92653398   -1.26463428
C    1.64981199    1.73029094   -1.59158667
C    1.22138893    0.47225038   -2.02364381
C    2.12364303   -0.56980558   -2.11565701
C    3.47199316   -0.37271987   -1.79813250
H    4.94077810    1.06809927   -1.12092760
H    3.31492842    2.89861648   -0.91578143
H    0.18641440    0.30193036   -2.30058181
H    1.80420357   -1.55367462   -2.43923437
N    0.73320992    2.82318975   -1.52291788
N    1.16201000    3.96022061   -2.05625475
O    0.38933315    4.91045385   -1.98169772
C   -0.62559134    2.69335870   -0.98315968
H   -0.98034964    1.69140402   -1.21806212
H   -1.23987817    3.40706580   -1.53423888

```

```

C   -0.73302990    2.96998204    0.50384394
C   -0.67267997    4.28906851    0.96296160
C   -0.93060680    1.94029546    1.43542187
C   -0.81142243    4.58642836    2.31287655
H   -0.51737006    5.08201416    0.23956961
C   -1.08153320    2.24491822    2.79117824
C   -1.02363794    3.56130874    3.23063719
H   -0.76194454    5.61740580    2.64665844
H   -1.23672196    1.43837730    3.50069526
H   -1.14171669    3.78351929    4.28573854
C   -0.96160843    0.49814640    1.02338934
C   -2.21201437   -0.00790403    0.55748739
C    0.26450405   -0.20632138    1.14315276
C   -2.40678631   -1.35180345    0.10349325
C   -3.34800053    0.85123836    0.53381986
C    0.44011062   -1.57885207    0.76449368
C    1.41645675    0.47760541    1.63597942
C   -3.64337815   -1.76239239   -0.33720784
C   -4.57640256    0.43989185    0.09439164
H   -3.25079170    1.87328076    0.87961817
C    1.67679892   -2.16837087    0.85429652
C    2.63650000   -0.12067454    1.75211716
H    1.33701986    1.51686522    1.92731558
C   -4.77315199   -0.89215061   -0.36501401
H   -3.76415170   -2.78461463   -0.67780870
H   -5.39719585    1.14439183    0.10473246
H    1.79105480   -3.20204310    0.54801119
C    2.82479669   -1.46579800    1.33085191
H    3.46816625    0.45959695    2.12728346
Si   -0.99218032   -2.58126507    0.09119084
C   -0.63601122   -3.14146624   -1.66232851
H   -0.52277668   -2.28578371   -2.33386119
H    0.28233047   -3.73609445   -1.70022752
H   -1.45554888   -3.76110857   -2.03945530
C   -1.36958947   -4.03483340    1.21120823
H   -2.24630005   -4.58081333    0.84874104
H   -0.52439844   -4.72981945    1.23559738
H   -1.56999480   -3.70062252    2.23281256

```

|   |             |             |             |   |             |             |             |
|---|-------------|-------------|-------------|---|-------------|-------------|-------------|
| N | -5.97343979 | -1.31430710 | -0.80560282 | N | 0.29129533  | 2.16565315  | -1.84821897 |
| N | 4.03682277  | -2.04516183 | 1.37334571  | N | 1.28406354  | 2.96476351  | -2.21865237 |
| C | -6.15322417 | -2.68403790 | -1.27111484 | O | 1.06839567  | 4.16182816  | -2.06086768 |
| H | -7.18589720 | -2.81928047 | -1.58513530 | C | -0.96915765 | 2.74855907  | -1.38158881 |
| H | -5.50526500 | -2.89969964 | -2.12643288 | H | -1.72378443 | 1.96572682  | -1.41969815 |
| H | -5.94074677 | -3.40419706 | -0.47474934 | H | -1.25091967 | 3.52299519  | -2.09811269 |
| C | -7.11252176 | -0.40484297 | -0.82356270 | C | -0.92096660 | 3.34837947  | 0.01145462  |
| H | -7.98215838 | -0.93182757 | -1.20987074 | C | -1.09050857 | 4.72561538  | 0.15959932  |
| H | -7.34871131 | -0.04717046 | 0.18355120  | C | -0.77564448 | 2.54994668  | 1.15912087  |
| H | -6.91932700 | 0.45748962  | -1.46931725 | C | -1.12077025 | 5.31781572  | 1.41686143  |
| C | 5.15974655  | -1.35462639 | 1.99693161  | H | -1.18919180 | 5.33986348  | -0.72966888 |
| H | 4.94649728  | -1.12732307 | 3.04579493  | C | -0.80121339 | 3.15649664  | 2.41943157  |
| H | 6.03796820  | -1.99534246 | 1.95594748  | C | -0.97494984 | 4.52920355  | 2.55368624  |
| H | 5.39240406  | -0.41942698 | 1.47755988  | H | -1.25345720 | 6.39082957  | 1.50653388  |
| C | 4.23966376  | -3.38362037 | 0.83081654  | H | -0.68376485 | 2.53387221  | 3.30119032  |
| H | 3.90745984  | -3.42228957 | -0.21024154 | H | -0.99559500 | 4.97861119  | 3.54095386  |
| H | 5.30209547  | -3.61740596 | 0.85656525  | C | -0.56864646 | 1.07027599  | 1.10002533  |
| H | 3.70563826  | -4.14013900 | 1.41462348  | C | -1.70570692 | 0.23395841  | 0.86668862  |
| O | 4.26400223  | -1.46510683 | -1.92261818 | C | 0.77866398  | 0.59684856  | 1.23519631  |
| C | 5.65570672  | -1.31154484 | -1.70643665 | C | -1.66036759 | -1.20850547 | 0.87113453  |
| H | 5.87059960  | -1.00247035 | -0.67843513 | C | -2.96827211 | 0.83102099  | 0.54251953  |
| H | 6.09791195  | -2.29091041 | -1.88399925 | C | 1.14153161  | -0.79177556 | 1.37632789  |
| H | 6.08779143  | -0.58297438 | -2.40079910 | C | 1.85661286  | 1.54058799  | 1.17464536  |

-----

### 1 ( $\pi$ - $\pi^*$ state)

Total Energy = -1937.9180263 A.U

-----

|   |             |             |             |    |             |             |             |
|---|-------------|-------------|-------------|----|-------------|-------------|-------------|
| C | 2.04719343  | -1.10117245 | -2.10469475 | C  | 3.16555852  | 1.15801470  | 1.16315576  |
| C | 1.80368784  | 0.25694566  | -1.93674042 | H  | 1.63046152  | 2.59667620  | 1.09174159  |
| C | 0.51156588  | 0.76673437  | -2.03303377 | C  | -3.92135953 | -1.31870845 | -0.07857548 |
| C | -0.54657159 | -0.10263191 | -2.30417863 | H  | -2.66347976 | -3.01738928 | 0.39594380  |
| C | -0.31173594 | -1.45972807 | -2.44878060 | H  | -4.93706993 | 0.61566038  | -0.19035726 |
| C | 0.98504771  | -1.97067702 | -2.35179489 | H  | 2.71134776  | -2.21826292 | 1.45155703  |
| H | 3.06308223  | -1.46362894 | -2.01059631 | C  | 3.52605105  | -0.22530650 | 1.22052726  |
| H | 2.62713821  | 0.92077173  | -1.70822898 | H  | 3.93052618  | 1.91950872  | 1.08405160  |
| H | -1.56423842 | 0.25746023  | -2.39794506 | Si | -0.19363603 | -2.06956130 | 1.63975196  |
| H | -1.13392347 | -2.14144756 | -2.63529177 | C  | 0.18475122  | -3.71284349 | 0.82702635  |
|   |             |             |             | H  | 0.27319248  | -3.62026990 | -0.25833828 |

|                                  |             |             |             |   |             |             |             |
|----------------------------------|-------------|-------------|-------------|---|-------------|-------------|-------------|
| H                                | 1.11863512  | -4.13143524 | 1.21659575  | C | 0.46392183  | -1.55156260 | 2.37513345  |
| H                                | -0.60807980 | -4.43515305 | 1.04788047  | C | -0.81880160 | -2.10182365 | 2.31219429  |
| C                                | -0.49280790 | -2.30438210 | 3.48084814  | H | -2.92537533 | -1.65172014 | 2.08535454  |
| H                                | -1.33619364 | -2.98116241 | 3.65129976  | H | -2.58047171 | 0.75699458  | 1.87071949  |
| H                                | 0.39227926  | -2.73336824 | 3.96172619  | H | 1.65689972  | 0.20804181  | 2.34636013  |
| H                                | -0.71602486 | -1.34864658 | 3.96437291  | H | 1.31518738  | -2.21223770 | 2.49504332  |
| N                                | -4.93167054 | -2.03913739 | -0.60730036 | N | -0.28191287 | 2.07365939  | 1.96353803  |
| N                                | 4.81650980  | -0.61330465 | 1.16197629  | N | -1.28195643 | 2.82182473  | 2.41243601  |
| C                                | -4.78797118 | -3.47452383 | -0.80282317 | O | -1.11225025 | 4.03121343  | 2.29868182  |
| H                                | -5.64528407 | -3.84658705 | -1.35932676 | C | 0.93662415  | 2.71866084  | 1.46812426  |
| H                                | -3.88230634 | -3.69795239 | -1.37497732 | H | 1.71684710  | 1.96096603  | 1.43800256  |
| H                                | -4.73949177 | -4.00437644 | 0.15530963  | H | 1.22582577  | 3.47069871  | 2.20523508  |
| C                                | -6.18596192 | -1.39956142 | -0.98171741 | C | 0.80591339  | 3.37578397  | 0.10657779  |
| H                                | -6.87391096 | -2.15589314 | -1.35272285 | C | 0.92435687  | 4.76307896  | 0.01250881  |
| H                                | -6.64928549 | -0.90740078 | -0.12064033 | C | 0.63409383  | 2.62298140  | -1.06796750 |
| H                                | -6.02932292 | -0.65752374 | -1.77174191 | C | 0.87836591  | 5.40951212  | -1.21726532 |
| C                                | 5.88518523  | 0.37224825  | 1.06513368  | H | 1.04375012  | 5.34151062  | 0.92300144  |
| H                                | 5.86979107  | 1.05431000  | 1.92095284  | C | 0.58276801  | 3.28372517  | -2.29992494 |
| H                                | 6.84322697  | -0.14209949 | 1.05527682  | C | 0.70620286  | 4.66604314  | -2.38050865 |
| H                                | 5.79819211  | 0.95787963  | 0.14380213  | H | 0.97245330  | 6.48927488  | -1.26486610 |
| C                                | 5.16327070  | -2.02692185 | 1.18126048  | H | 0.44520819  | 2.69598608  | -3.20247507 |
| H                                | 4.68034259  | -2.55830832 | 0.35473916  | H | 0.66742634  | 5.15794175  | -3.34675031 |
| H                                | 6.24033314  | -2.13209740 | 1.07380812  | C | 0.47733212  | 1.13597534  | -1.06580862 |
| H                                | 4.86203457  | -2.49495738 | 2.12465663  | C | 1.64994626  | 0.32936311  | -0.92055324 |
| O                                | 1.10656982  | -3.31490332 | -2.49846069 | C | -0.85898839 | 0.62349438  | -1.16231678 |
| C                                | 2.38196257  | -3.89167031 | -2.27454521 | C | 1.65045711  | -1.11229709 | -0.98722847 |
| H                                | 2.73493444  | -3.68361134 | -1.25773109 | C | 2.90636098  | 0.95428134  | -0.62632253 |
| H                                | 2.25296517  | -4.96605126 | -2.39803862 | C | -1.18349701 | -0.76924053 | -1.34911283 |
| H                                | 3.11930945  | -3.52949512 | -2.99899238 | C | -1.96256464 | 1.52673398  | -1.01215717 |
| -----                            |             |             |             | C | 2.76004670  | -1.82248353 | -0.58739172 |
| <b>1 (CT state)</b>              |             |             |             | C | 4.00341826  | 0.24108293  | -0.23818530 |
| Total Energy = -1937.9398574 A.U |             |             |             | H | 2.98501745  | 2.03433995  | -0.67539434 |
| -----                            |             |             |             | C | -2.49314556 | -1.18953511 | -1.28478426 |
| C                                | -1.91844204 | -1.25922886 | 2.15088615  | C | -3.25678895 | 1.09998760  | -0.96021989 |
| C                                | -1.72660089 | 0.11241064  | 2.03312297  | H | -1.76664331 | 2.58528355  | -0.89202958 |
| C                                | -0.44854610 | 0.66136501  | 2.09536885  |   |             |             |             |
| C                                | 0.64817651  | -0.18225161 | 2.28108967  |   |             |             |             |

|    |             |             |             |
|----|-------------|-------------|-------------|
| C  | 3.95503860  | -1.18675350 | -0.14487312 |
| H  | 2.73139405  | -2.90499156 | -0.63818701 |
| H  | 4.91250541  | 0.77434491  | 0.00810152  |
| H  | -2.70880071 | -2.24347759 | -1.41841763 |
| C  | -3.57528873 | -0.29096915 | -1.06338862 |
| H  | -4.04120485 | 1.83104585  | -0.81343410 |
| Si | 0.17836691  | -1.98848468 | -1.72795780 |
| C  | -0.11022609 | -3.67717351 | -0.97364435 |
| H  | -0.15324817 | -3.63445613 | 0.11755445  |
| H  | -1.04652240 | -4.11023045 | -1.34099404 |
| H  | 0.69485955  | -4.36185228 | -1.26024849 |
| C  | 0.40050658  | -2.13298297 | -3.58915420 |
| H  | 1.25637551  | -2.77274264 | -3.82702244 |
| H  | -0.49150147 | -2.57037059 | -4.04922250 |
| H  | 0.57081895  | -1.15011136 | -4.03862186 |
| N  | 5.01106217  | -1.89471825 | 0.30552341  |
| N  | -4.84875326 | -0.72453078 | -0.96571884 |
| C  | 4.92235547  | -3.34126717 | 0.44280518  |
| H  | 5.81586429  | -3.70782184 | 0.94319779  |
| H  | 4.05164144  | -3.61979479 | 1.04429689  |
| H  | 4.84661510  | -3.83048593 | -0.53496805 |
| C  | 6.26028206  | -1.22982240 | 0.65175898  |
| H  | 6.98833068  | -1.97775547 | 0.95753056  |
| H  | 6.66750219  | -0.68554838 | -0.20631068 |
| H  | 6.11668079  | -0.52832227 | 1.48035108  |
| C  | -5.94285365 | 0.21923573  | -0.77876434 |
| H  | -5.98723214 | 0.93802174  | -1.60291973 |
| H  | -6.88266603 | -0.32708861 | -0.75082971 |
| H  | -5.83369849 | 0.76682227  | 0.16338769  |
| C  | -5.15074393 | -2.14695788 | -1.03220077 |
| H  | -4.61362320 | -2.69658205 | -0.25237877 |
| H  | -6.21782621 | -2.29308185 | -0.88166397 |
| H  | -4.87839424 | -2.56367924 | -2.00790017 |
| O  | -0.89026269 | -3.45452669 | 2.40388018  |
| C  | -2.15527095 | -4.06424245 | 2.21043880  |

|   |             |             |            |
|---|-------------|-------------|------------|
| H | -2.56036765 | -3.82463954 | 1.22034167 |
| H | -1.98634616 | -5.13792943 | 2.28005653 |
| H | -2.87038280 | -3.75904267 | 2.98189839 |

-----

### 1 (CT-MECI)

Total Energy = -1937.8992854 A.U

-----

|   |             |             |             |
|---|-------------|-------------|-------------|
| C | 2.13422259  | -1.21453554 | -2.15410330 |
| C | 1.94819686  | 0.18817935  | -1.96552771 |
| C | 0.68504844  | 0.71611248  | -1.91992314 |
| C | -0.38951877 | -0.16301370 | -2.08523521 |
| C | -0.18658774 | -1.49558901 | -2.25514780 |
| C | 1.09702352  | -2.05364684 | -2.27947575 |
| H | 3.15489810  | -1.58212761 | -2.22672134 |
| H | 2.78132204  | 0.87270797  | -1.88657491 |
| H | -1.39592297 | 0.20501998  | -1.97591179 |
| H | -1.00679216 | -2.18509843 | -2.33969700 |
| N | 0.48310146  | 2.05282874  | -1.57104827 |
| N | 1.70421701  | 2.93512910  | -1.64512142 |
| O | 1.44351493  | 4.05041687  | -1.60830632 |
| C | -0.78472897 | 2.76012193  | -1.29987499 |
| H | -1.57553036 | 2.03337266  | -1.49185301 |
| H | -0.86232208 | 3.56695090  | -2.06564723 |
| C | -0.89665104 | 3.39501858  | 0.07019222  |
| C | -1.07114576 | 4.75900927  | 0.18130372  |
| C | -0.91976915 | 2.60105374  | 1.21716016  |
| C | -1.23769382 | 5.34079362  | 1.42421485  |
| H | -1.04014722 | 5.39025774  | -0.70221789 |
| C | -1.04038854 | 3.19825391  | 2.45050126  |
| C | -1.20530995 | 4.56696529  | 2.55870802  |
| H | -1.38744698 | 6.40450407  | 1.49642214  |
| H | -1.03287769 | 2.57021236  | 3.33684190  |
| H | -1.35185395 | 5.01454313  | 3.53316925  |
| C | -0.85596992 | 1.12036819  | 1.16153666  |
| C | -1.73102523 | 0.33536559  | 0.90468606  |



|    |             |             |             |                                  |             |             |             |
|----|-------------|-------------|-------------|----------------------------------|-------------|-------------|-------------|
| C  | -1.14946037 | 4.77367161  | 0.20447701  | H                                | 0.36870812  | -2.45837559 | 4.07308486  |
| C  | -0.79680563 | 2.55416022  | 1.18293025  | H                                | -0.70404940 | -1.05531931 | 3.96266584  |
| C  | -1.21280903 | 5.35245092  | 1.46613143  | N                                | -4.83321714 | -2.19355413 | -0.99998984 |
| H  | -1.27545754 | 5.39868270  | -0.67607339 | N                                | 4.86034159  | -0.78919994 | 0.63344236  |
| C  | -0.85931386 | 3.17412454  | 2.43388351  | C                                | -4.82531472 | -3.60984786 | -0.68863245 |
| C  | -1.06173759 | 4.54345302  | 2.58452895  | H                                | -5.62838156 | -4.10121110 | -1.24087443 |
| H  | -1.38361580 | 6.41857080  | 1.56704247  | H                                | -3.88687296 | -4.07056677 | -1.01076759 |
| H  | -0.75581746 | 2.54350605  | 3.31077220  | H                                | -4.95834391 | -3.82498524 | 0.38395979  |
| H  | -1.11453468 | 4.97708900  | 3.57769974  | C                                | -6.16592521 | -1.61835017 | -1.06644573 |
| C  | -0.58440735 | 1.07444619  | 1.08875962  | H                                | -6.83942428 | -2.33364771 | -1.54187472 |
| C  | -1.72813285 | 0.22449698  | 0.76233844  | H                                | -6.57725324 | -1.35795733 | -0.07852010 |
| C  | 0.78292506  | 0.57583363  | 1.17575321  | H                                | -6.17147804 | -0.71849264 | -1.68722546 |
| C  | -1.68804751 | -1.19151267 | 0.82031209  | C                                | 5.91339431  | 0.16298148  | 0.95352963  |
| C  | -2.94715278 | 0.76601623  | 0.29680469  | H                                | 5.92052820  | 0.46881839  | 2.01175639  |
| C  | 1.12650924  | -0.80046364 | 1.26424606  | H                                | 6.88151381  | -0.28216308 | 0.71553131  |
| C  | 1.89222689  | 1.44976130  | 1.12692343  | H                                | 5.81911643  | 1.06370602  | 0.34148354  |
| C  | -2.71710019 | -1.96480312 | 0.25427584  | C                                | 5.17673569  | -2.12912886 | 1.09381490  |
| C  | -3.95957590 | -0.01154137 | -0.25018940 | H                                | 4.55758626  | -2.87299234 | 0.58159706  |
| H  | -3.12382839 | 1.83582228  | 0.37349388  | H                                | 6.21602074  | -2.35592907 | 0.84784868  |
| C  | 2.46766575  | -1.22118288 | 1.13600572  | H                                | 5.03258435  | -2.26964046 | 2.17650144  |
| C  | 3.20638669  | 1.01743978  | 1.01393248  | O                                | 1.15646229  | -3.04388669 | -2.37865980 |
| H  | 1.72171446  | 2.52036269  | 1.20172073  | C                                | 2.44018689  | -3.72912685 | -2.27457731 |
| C  | -3.85022610 | -1.40990783 | -0.34527537 | H                                | 2.90043475  | -3.46760857 | -1.32687129 |
| H  | -2.62835581 | -3.04462034 | 0.32541596  | H                                | 2.18200479  | -4.78212349 | -2.30640592 |
| H  | -4.85845635 | 0.49350619  | -0.58449623 | H                                | 3.05522349  | -3.45763019 | -3.13107695 |
| H  | 2.66192764  | -2.28696650 | 1.22338295  | -----                            |             |             |             |
| C  | 3.53224159  | -0.34688736 | 0.94666202  | <b>2 (Ground state)</b>          |             |             |             |
| H  | 3.98306276  | 1.77438402  | 0.99672247  | Total Energy = -1915.7304924 A.U |             |             |             |
| Si | -0.25194167 | -1.96712704 | 1.70583776  | -----                            |             |             |             |
| C  | 0.07661604  | -3.72555697 | 1.08172029  | C                                | -4.06893271 | 1.27043865  | 1.36493982  |
| H  | 0.06730797  | -3.79398208 | -0.00918882 | C                                | -3.06195973 | 2.21778859  | 1.26406728  |
| H  | 1.03689720  | -4.10549281 | 1.44725484  | C                                | -1.74415110 | 1.86475984  | 1.55852049  |
| H  | -0.69268615 | -4.41174182 | 1.45041209  | C                                | -1.42706243 | 0.55645942  | 1.92709804  |
| C  | -0.51267358 | -2.05562477 | 3.56336907  | C                                | -2.42855945 | -0.39683302 | 2.01131237  |
| H  | -1.37093124 | -2.68742337 | 3.81431682  | C                                | -3.75344120 | -0.03979496 | 1.73825797  |



|   |             |             |             |    |             |             |             |
|---|-------------|-------------|-------------|----|-------------|-------------|-------------|
| C | -1.12181774 | 0.67469222  | 2.03625194  | H  | -1.58216419 | 1.49907808  | -1.65175660 |
| C | -2.13632756 | -0.26575507 | 2.10602893  | C  | 4.61333416  | -1.15733892 | 0.17840823  |
| C | -3.45406959 | 0.11375385  | 1.83295241  | H  | 3.53824283  | -2.98737827 | 0.60190816  |
| H | -4.77580511 | 1.72471173  | 1.27306295  | H  | 5.30629260  | 0.82943642  | -0.41823513 |
| H | -2.95133069 | 3.39440877  | 1.12461392  | H  | -2.01347125 | -3.28243088 | -0.48008015 |
| H | -0.10493448 | 0.38011751  | 2.26750334  | C  | -3.06083135 | -1.52594136 | -1.18669881 |
| H | -1.90959276 | -1.29155066 | 2.37112781  | H  | -3.73143724 | 0.46401296  | -1.79649262 |
| N | -0.38729092 | 2.96339215  | 1.61931324  | Si | 0.74881249  | -2.68460925 | -0.00082928 |
| N | -0.68396497 | 4.14619161  | 2.16018653  | C  | 0.43369601  | -3.17027203 | 1.78695684  |
| O | 0.17600681  | 5.00771004  | 2.05490914  | H  | 0.37805086  | -2.29043238 | 2.43468530  |
| C | 0.89729293  | 2.70818685  | 0.95513147  | H  | -0.50584555 | -3.72549633 | 1.87670413  |
| H | 1.20625696  | 1.69217010  | 1.19517822  | H  | 1.23868293  | -3.81149547 | 2.16027039  |
| H | 1.61236126  | 3.39697344  | 1.40540960  | C  | 1.02500827  | -4.22209066 | -1.04081081 |
| C | 0.82830428  | 2.92136558  | -0.54312556 | H  | 1.88808670  | -4.78738240 | -0.67472003 |
| C | 0.81833557  | 4.22848867  | -1.03982800 | H  | 0.15188505  | -4.88100537 | -0.99487344 |
| C | 0.78620516  | 1.84317020  | -1.44200433 | H  | 1.20373776  | -3.96160880 | -2.08767115 |
| C | 0.77147760  | 4.47546054  | -2.40591731 | N  | 5.82007498  | -1.61973081 | 0.56278526  |
| H | 0.84937844  | 5.05430516  | -0.33677857 | N  | -4.27158879 | -2.11445344 | -1.26860817 |
| C | 0.75054471  | 2.10579692  | -2.81670497 | C  | 5.96662872  | -2.98273554 | 1.05498113  |
| C | 0.74119731  | 3.40826131  | -3.29967087 | H  | 7.00853987  | -3.15881440 | 1.31160249  |
| H | 0.76560303  | 5.49688920  | -2.77138326 | H  | 5.35750117  | -3.14419655 | 1.95053657  |
| H | 0.72479551  | 1.26915792  | -3.50814586 | H  | 5.67101786  | -3.70963055 | 0.29122111  |
| H | 0.71284002  | 3.58859329  | -4.36911537 | C  | 7.00026784  | -0.76807515 | 0.48815183  |
| C | 0.77901923  | 0.41791353  | -0.98694869 | H  | 7.85885160  | -1.31698562 | 0.86770930  |
| C | 2.03266535  | -0.16185290 | -0.60721679 | H  | 7.20869371  | -0.47281308 | -0.54546557 |
| C | -0.47906811 | -0.27108743 | -1.02103477 | H  | 6.87220235  | 0.13374121  | 1.09514479  |
| C | 2.19689279  | -1.51193813 | -0.12733919 | C  | -5.44718816 | -1.34242253 | -1.64594648 |
| C | 3.22448704  | 0.63442524  | -0.69620482 | H  | -5.32354593 | -0.89965400 | -2.63896298 |
| C | -0.65990032 | -1.65625652 | -0.66553010 | H  | -6.31168998 | -2.00159117 | -1.67001053 |
| C | -1.65748525 | 0.44504784  | -1.41710934 | H  | -5.64391101 | -0.54459182 | -0.92163083 |
| C | 3.44404762  | -1.96792437 | 0.24416419  | C  | -4.43944492 | -3.51135829 | -0.89550125 |
| C | 4.45153742  | 0.17265454  | -0.32242523 | H  | -4.20387445 | -3.66351177 | 0.16344647  |
| H | 3.15641813  | 1.64466465  | -1.08053487 | H  | -5.47403172 | -3.80200895 | -1.06197764 |
| C | -1.90585963 | -2.24039136 | -0.76062807 | H  | -3.79768764 | -4.15752797 | -1.50260014 |
| C | -2.88483166 | -0.14188883 | -1.50094984 | C  | -4.49912607 | -0.86858992 | 1.88030475  |

N -5.34099047 -1.66626270 1.90386087

-----

## 2 (CT state)

Total Energy = -1915.6228175 A.U

-----

C -2.40878757 -0.59519450 2.14484339  
C -2.01799732 0.71449455 2.10392320  
C -0.62850703 1.03628115 2.03268337  
C 0.34208746 -0.00376687 2.07521550  
C -0.06393690 -1.31411312 2.12027201  
C -1.43735256 -1.62027839 2.12059320  
H -3.46091297 -0.84896241 2.16673791  
H -2.75481238 1.50280294 2.09395791  
H 1.39893823 0.21815026 2.08952626  
H 0.67455129 -2.10475103 2.14803560  
N -0.24736972 2.34477835 1.92594026  
N -1.22940764 3.27735290 2.28620456  
O -0.86883627 4.41141476 2.17998583  
C 1.03883002 2.82892843 1.41273053  
H 1.76918110 2.02847060 1.49186066  
H 1.36171098 3.64359811 2.06075169  
C 0.86812922 3.31115193 -0.01439013  
C 0.98829051 4.67793149 -0.27394716  
C 0.56248280 2.42191850 -1.06590006  
C 0.81801125 5.17942665 -1.55727094  
H 1.21792264 5.35371087 0.54325382  
C 0.36797686 2.95269661 -2.34953446  
C 0.49787633 4.31089271 -2.59953918  
H 0.92828665 6.24235930 -1.74226114  
H 0.12169987 2.27168008 -3.15819218  
H 0.35461059 4.69213896 -3.60496044  
C 0.45123973 0.94441150 -0.90391434  
C 1.68546892 0.19812229 -0.70932845  
C -0.86018810 0.36691507 -1.01558017  
C 1.75321702 -1.22390777 -0.72676322

C 2.90258140 0.87344447 -0.44903312  
C -1.11094589 -1.03655493 -1.07631802  
C -2.01429227 1.20189799 -0.98006784  
C 2.91828525 -1.88336801 -0.35495177  
C 4.05705854 0.21439184 -0.08157701  
H 2.94976810 1.95367255 -0.53338401  
C -2.41436572 -1.52623302 -0.99857773  
C -3.30031054 0.70839422 -0.93673344  
H -1.88897841 2.27946728 -0.97896359  
C 4.09004368 -1.19531832 0.03046197  
H 2.92639110 -2.96766884 -0.38150704  
H 4.94386152 0.80310723 0.11716063  
H -2.55971777 -2.60092004 -1.02527085  
C -3.54773542 -0.68324754 -0.89995329  
H -4.11956397 1.41480709 -0.89210050  
Si 0.31874501 -2.18910338 -1.42208189  
C 0.14022492 -3.88708931 -0.64315179  
H 0.22675973 -3.86552787 0.44577938  
H -0.82288682 -4.34166266 -0.89589842  
H 0.92265012 -4.55043919 -1.02609637  
C 0.51248836 -2.36723580 -3.28420258  
H 1.40311135 -2.95623614 -3.52564879  
H -0.35833893 -2.86922031 -3.71807922  
H 0.61201796 -1.38492646 -3.75600928  
N 5.20856549 -1.85679264 0.46019697  
N -4.80802191 -1.19103820 -0.76918513  
C 5.23303401 -3.30699203 0.46728808  
H 6.17260063 -3.64718013 0.90055446  
H 4.41793872 -3.71089928 1.07752309  
H 5.14811170 -3.72922331 -0.54281491  
C 6.43765147 -1.12312198 0.69731862  
H 7.20254485 -1.81200631 1.05295897  
H 6.81143483 -0.63728181 -0.21328476  
H 6.29787748 -0.35406981 1.46485326  
C -5.93425794 -0.29171613 -0.59958360

|   |             |             |             |   |             |             |             |
|---|-------------|-------------|-------------|---|-------------|-------------|-------------|
| H | -6.05551268 | 0.36692152  | -1.46702299 | C | 0.05683634  | 4.46500320  | -2.51990975 |
| H | -6.84653619 | -0.87596465 | -0.49225991 | H | 0.26526547  | 6.36720066  | -1.53849400 |
| H | -5.82038161 | 0.33324728  | 0.29504287  | H | -0.08962105 | 2.43708761  | -3.20850438 |
| C | -5.00996921 | -2.62550741 | -0.67389557 | H | -0.21404810 | 4.88844792  | -3.48116843 |
| H | -4.47512508 | -3.05481706 | 0.18265490  | C | 0.45496960  | 1.01041385  | -1.06646298 |
| H | -6.07173685 | -2.82862665 | -0.54514567 | C | 1.64102225  | 0.24938112  | -1.11220915 |
| H | -4.67629746 | -3.14010061 | -1.58212618 | C | -0.82997470 | 0.34597289  | -1.21341103 |
| C | -1.86910169 | -2.98381515 | 2.13315681  | C | 1.64679254  | -1.22055820 | -1.14517283 |
| N | -2.23103196 | -4.08546543 | 2.12714141  | C | 2.92332509  | 0.90643466  | -0.92396673 |

-----

## 2 (CT-MECI)

Total Energy = -1915.6228099 A.U

-----

|   |             |             |             |    |             |             |             |
|---|-------------|-------------|-------------|----|-------------|-------------|-------------|
| C | -2.08433496 | -0.48742096 | 2.39874744  | C  | 3.86217468  | 0.24933764  | -0.21882575 |
| C | -1.61482315 | 0.81692840  | 2.44425476  | H  | 3.03521598  | 1.95770212  | -1.16360975 |
| C | -0.25228800 | 1.07198798  | 2.29497028  | C  | -2.19217666 | -1.70291729 | -1.20507280 |
| C | 0.64230350  | 0.01163256  | 2.18103837  | C  | -3.17928830 | 0.48279268  | -0.69887721 |
| C | 0.17396721  | -1.28816625 | 2.09875591  | H  | -1.94880850 | 2.18985718  | -0.87734712 |
| C | -1.19581306 | -1.54052876 | 2.17458995  | C  | 3.66800767  | -1.14871947 | 0.19105586  |
| H | -3.14611868 | -0.69258711 | 2.48398675  | H  | 2.63158993  | -2.94504166 | -0.36685516 |
| H | -2.29480788 | 1.64988212  | 2.57174160  | H  | 4.77879720  | 0.75853567  | 0.05482356  |
| H | 1.70850622  | 0.19467810  | 2.10944418  | H  | -2.33128499 | -2.74371108 | -1.46973222 |
| H | 0.86128846  | -2.11100164 | 1.93660711  | C  | -3.30921393 | -0.97009133 | -0.75515921 |
| N | 0.20290248  | 2.41594704  | 2.20747557  | H  | -4.02171842 | 1.07511716  | -0.36132481 |
| N | -0.34313500 | 3.28427633  | 3.08868254  | Si | 0.40504532  | -2.06431701 | -2.21741608 |
| O | 0.08547379  | 4.38138659  | 2.98779102  | C  | 0.22935596  | -3.88266241 | -1.81861823 |
| C | 1.26233983  | 2.82210891  | 1.29203476  | H  | -0.11431174 | -4.04921222 | -0.79289571 |
| H | 1.94435185  | 1.98501529  | 1.15576622  | H  | -0.49073792 | -4.36829888 | -2.48566620 |
| H | 1.79492620  | 3.62376774  | 1.80836221  | H  | 1.17524532  | -4.41661935 | -1.96062572 |
| C | 0.78653151  | 3.34606650  | -0.05204125 | C  | 0.67628267  | -1.74993334 | -4.04327150 |
| C | 0.69782805  | 4.72949824  | -0.22025628 | H  | 1.56248327  | -2.27796673 | -4.40968564 |
| C | 0.48124490  | 2.50761663  | -1.13834282 | H  | -0.17894068 | -2.09065746 | -4.63601269 |
| C | 0.33031610  | 5.28935435  | -1.43838151 | H  | 0.81822797  | -0.68485137 | -4.24845126 |
| H | 0.89995079  | 5.36717024  | 0.63392723  | N  | 4.61032420  | -1.74318617 | 0.95916031  |
| C | 0.13206639  | 3.08533723  | -2.36466417 | N  | -4.50222599 | -1.52897419 | -0.51104801 |
|   |             |             |             | C  | 4.37107060  | -3.07834261 | 1.47834921  |

|   |             |             |             |
|---|-------------|-------------|-------------|
| H | 4.99922115  | -3.24866169 | 2.35370291  |
| H | 3.32471251  | -3.17122013 | 1.78236023  |
| H | 4.58903833  | -3.85873642 | 0.73586810  |
| C | 5.93056050  | -1.15668923 | 1.17347103  |
| H | 6.56802651  | -1.89283653 | 1.66200756  |
| H | 6.40820908  | -0.88408668 | 0.22806469  |
| H | 5.88067417  | -0.27444590 | 1.82230914  |
| C | -5.73714166 | -0.74219992 | -0.50675659 |
| H | -5.79588153 | -0.08152447 | -1.37472533 |
| H | -6.58591674 | -1.42314322 | -0.55177361 |
| H | -5.83315239 | -0.14973365 | 0.41009253  |
| C | -4.64189424 | -2.98342612 | -0.46204885 |
| H | -3.78810670 | -3.43809720 | 0.04389174  |
| H | -5.53796596 | -3.23331901 | 0.10653961  |
| H | -4.74109719 | -3.40113752 | -1.47230684 |
| C | -1.68301811 | -2.85416581 | 1.87063649  |
| N | -2.06506907 | -3.88359120 | 1.49874251  |

**3 (Ground state)**

Total Energy = -1922.7295345 A.U

|   |             |             |            |
|---|-------------|-------------|------------|
| C | -4.22182324 | 1.09325889  | 1.33188086 |
| C | -3.22117178 | 2.05785539  | 1.29916601 |
| C | -1.91760100 | 1.72183192  | 1.65921988 |
| C | -1.60492450 | 0.41579826  | 2.03688761 |
| C | -2.59369541 | -0.55780771 | 2.05236339 |
| C | -3.88631276 | -0.19849580 | 1.70249093 |
| H | -5.24230726 | 1.33306088  | 1.05774828 |
| H | -3.44942812 | 3.07179907  | 0.99287741 |
| H | -0.59535738 | 0.15290237  | 2.33217800 |
| H | -2.37032218 | -1.58031540 | 2.33193973 |
| N | -0.91136094 | 2.73312422  | 1.67104159 |
| N | -1.24533478 | 3.85941913  | 2.29270037 |
| O | -0.40255866 | 4.74858963  | 2.27474882 |
| C | 0.41298995  | 2.54042212  | 1.07102446 |

|    |             |             |             |
|----|-------------|-------------|-------------|
| H  | 0.72007615  | 1.51321403  | 1.26272389  |
| H  | 1.09001310  | 3.20226060  | 1.61313723  |
| C  | 0.45481745  | 2.85835169  | -0.41030945 |
| C  | 0.31165912  | 4.18324981  | -0.83227254 |
| C  | 0.65796290  | 1.86062956  | -1.37356701 |
| C  | 0.37510316  | 4.51654796  | -2.17920602 |
| H  | 0.15406715  | 4.95352645  | -0.08478121 |
| C  | 0.73277077  | 2.20148883  | -2.72699035 |
| C  | 0.59300866  | 3.52315811  | -3.13042809 |
| H  | 0.26201788  | 5.55100769  | -2.48545255 |
| H  | 0.89285936  | 1.41922144  | -3.46207830 |
| H  | 0.65151721  | 3.77467175  | -4.18389797 |
| C  | 0.77365218  | 0.41622296  | -0.98715585 |
| C  | 2.06977428  | -0.04068998 | -0.60333859 |
| C  | -0.42754671 | -0.33798559 | -1.04262286 |
| C  | 2.34434252  | -1.37339398 | -0.15659850 |
| C  | 3.17228837  | 0.85979414  | -0.66036581 |
| C  | -0.52117173 | -1.71736707 | -0.66153894 |
| C  | -1.63394602 | 0.29412537  | -1.47260185 |
| C  | 3.62355244  | -1.73737551 | 0.19323613  |
| C  | 4.44362835  | 0.49422141  | -0.31202020 |
| H  | 3.01332112  | 1.87645314  | -0.99904289 |
| C  | -1.73026469 | -2.36627951 | -0.70121165 |
| C  | -2.83102938 | -0.35803817 | -1.52368112 |
| H  | -1.61733042 | 1.33670534  | -1.76296855 |
| C  | 4.72145323  | -0.82870136 | 0.13162372  |
| H  | 3.80511577  | -2.75116035 | 0.53174541  |
| H  | 5.23572767  | 1.22751996  | -0.38351851 |
| H  | -1.77951932 | -3.40417568 | -0.39219787 |
| C  | -2.93374009 | -1.71594525 | -1.11026171 |
| H  | -3.70956275 | 0.18812237  | -1.83857128 |
| Si | 0.97225020  | -2.64138558 | -0.00934581 |
| C  | 0.69443511  | -3.09364871 | 1.78896583  |
| H  | 0.51879596  | -2.20076198 | 2.39564246  |
| H  | -0.17343679 | -3.75324868 | 1.88890101  |

|   |             |             |             |   |             |             |             |
|---|-------------|-------------|-------------|---|-------------|-------------|-------------|
| H | 1.56661700  | -3.61494873 | 2.19537578  | H | -3.34954947 | 3.08396322  | 1.04488720  |
| C | 1.33980218  | -4.15144346 | -1.05442341 | H | -0.42110930 | 0.20602873  | 2.31191090  |
| H | 2.24056710  | -4.65889041 | -0.69520817 | H | -2.15743239 | -1.56825491 | 2.28663739  |
| H | 0.51011270  | -4.86358177 | -1.00491669 | N | -0.79922622 | 2.78709093  | 1.69805019  |
| H | 1.49449827  | -3.87523736 | -2.10094965 | N | -1.15984650 | 3.90726759  | 2.31532556  |
| N | 5.96566008  | -1.20832881 | 0.47841977  | O | -0.34282543 | 4.82004178  | 2.28611906  |
| N | -4.11684832 | -2.35148638 | -1.08134041 | C | 0.51391682  | 2.63329590  | 1.06225736  |
| C | 6.22858502  | -2.57215340 | 0.92151425  | H | 0.86539838  | 1.62168138  | 1.26087149  |
| H | 7.28877604  | -2.67533535 | 1.14166386  | H | 1.17874617  | 3.33332873  | 1.56937886  |
| H | 5.66586971  | -2.80908612 | 1.82995441  | C | 0.48513479  | 2.91883717  | -0.42474060 |
| H | 5.96904329  | -3.29762249 | 0.14424742  | C | 0.34636111  | 4.24106631  | -0.85829190 |
| C | 7.07027692  | -0.25930984 | 0.41256618  | C | 0.61114313  | 1.89301959  | -1.37491686 |
| H | 7.98239361  | -0.75157075 | 0.74286899  | C | 0.33851442  | 4.55330066  | -2.21164108 |
| H | 7.22442710  | 0.09761191  | -0.61065138 | H | 0.24658149  | 5.02585585  | -0.11548893 |
| H | 6.89058476  | 0.60102487  | 1.06462158  | C | 0.61577528  | 2.22189412  | -2.73553210 |
| C | -5.33541064 | -1.66300192 | -1.48991876 | C | 0.47942495  | 3.53907008  | -3.15564307 |
| H | -5.23929453 | -1.27028412 | -2.50521387 | H | 0.23018066  | 5.58525739  | -2.52849247 |
| H | -6.16179047 | -2.37033632 | -1.47941712 | H | 0.71937859  | 1.42533113  | -3.46599630 |
| H | -5.57380067 | -0.84170148 | -0.80685065 | H | 0.48326939  | 3.77236285  | -4.21521334 |
| C | -4.22545713 | -3.68648834 | -0.50468726 | C | 0.72571894  | 0.45572485  | -0.97649204 |
| H | -3.87732422 | -3.69150313 | 0.53270508  | C | 2.01794942  | -0.02498390 | -0.59173507 |
| H | -5.26919478 | -3.99239905 | -0.51526799 | C | -0.47195798 | -0.33188397 | -1.03542509 |
| H | -3.64995983 | -4.41646003 | -1.08109368 | C | 2.28738681  | -1.36481912 | -0.13096879 |
| F | -4.84286735 | -1.14512674 | 1.70408818  | C | 3.14026481  | 0.86870052  | -0.65410652 |

-----

### 3 ( $\pi$ - $\pi^*$ state)

Total Energy = -1922.6378012 A.U

-----

|   |             |             |            |
|---|-------------|-------------|------------|
| C | -4.07280470 | 1.08122116  | 1.34263052 |
| C | -3.09663153 | 2.06971869  | 1.32983594 |
| C | -1.78328237 | 1.75660289  | 1.67747076 |
| C | -1.43878884 | 0.45055936  | 2.02813089 |
| C | -2.40478527 | -0.54558934 | 2.02902622 |
| C | -3.70472816 | -0.21105975 | 1.68381113 |
| H | -5.09905275 | 1.30110431  | 1.07350347 |

|   |             |             |             |
|---|-------------|-------------|-------------|
| C | -0.54988485 | -1.72440686 | -0.67324326 |
| C | -1.69353135 | 0.28741742  | -1.46173504 |
| C | 3.56776679  | -1.72820363 | 0.22967348  |
| C | 4.40096414  | 0.49765622  | -0.29087618 |
| H | 2.98873436  | 1.88037719  | -1.01001586 |
| C | -1.75411038 | -2.39302806 | -0.74374672 |
| C | -2.87783290 | -0.38370934 | -1.52438462 |
| H | -1.68921097 | 1.33536852  | -1.73208810 |
| C | 4.67004620  | -0.82828418 | 0.17313978  |
| H | 3.74209437  | -2.74151863 | 0.57465615  |
| H | 5.20039753  | 1.22343543  | -0.36601451 |

|                                  |             |             |             |   |             |             |             |
|----------------------------------|-------------|-------------|-------------|---|-------------|-------------|-------------|
| H                                | -1.78743265 | -3.43546464 | -0.44630255 | C | -2.14932826 | -1.27034591 | 2.24734021  |
| C                                | -2.96244028 | -1.76077230 | -1.15025312 | C | -2.03534862 | 0.08848162  | 2.23379995  |
| H                                | -3.76365987 | 0.15338724  | -1.83674863 | C | -0.74276330 | 0.69550187  | 2.10260060  |
| Si                               | 0.92803435  | -2.63851850 | 0.00562088  | C | 0.42389914  | -0.12562336 | 2.07830144  |
| C                                | 0.63222669  | -3.11515483 | 1.79926586  | C | 0.30041219  | -1.48934387 | 2.09778569  |
| H                                | 0.44477061  | -2.23221388 | 2.41752801  | C | -0.98234243 | -2.04695378 | 2.14659041  |
| H                                | -0.23177736 | -3.78271077 | 1.88291985  | H | -3.11333199 | -1.75708808 | 2.30856804  |
| H                                | 1.50171986  | -3.63774664 | 2.21068899  | H | -2.91707376 | 0.70747721  | 2.28020318  |
| C                                | 1.32346337  | -4.16813795 | -1.00728262 | H | 1.41218107  | 0.30748685  | 2.04776497  |
| H                                | 2.22006945  | -4.66590584 | -0.62397584 | H | 1.17061607  | -2.13102894 | 2.06517773  |
| H                                | 0.49857949  | -4.88647321 | -0.96007765 | N | -0.64930427 | 2.05202077  | 1.98848667  |
| H                                | 1.49530662  | -3.91125212 | -2.05619445 | N | -1.82293573 | 2.75269017  | 2.29955408  |
| N                                | 5.91294679  | -1.20509903 | 0.53645928  | O | -1.70437976 | 3.93772038  | 2.20557744  |
| N                                | -4.14241628 | -2.41480190 | -1.15233680 | C | 0.52166925  | 2.81271841  | 1.53828251  |
| C                                | 6.16874442  | -2.56457696 | 0.99187390  | H | 1.39408269  | 2.16799076  | 1.59786434  |
| H                                | 7.22578243  | -2.66969443 | 1.22429864  | H | 0.66397399  | 3.63033846  | 2.24543585  |
| H                                | 5.59152864  | -2.79187407 | 1.89435559  | C | 0.31957784  | 3.35287832  | 0.13453417  |
| H                                | 5.91157676  | -3.29314605 | 0.21595041  | C | 0.27518490  | 4.73648329  | -0.04538545 |
| C                                | 7.02180526  | -0.26157310 | 0.47748754  | C | 0.18626741  | 2.49730321  | -0.97431329 |
| H                                | 7.92514042  | -0.75199900 | 0.83272890  | C | 0.10105456  | 5.28812973  | -1.30844439 |
| H                                | 7.19477567  | 0.07954551  | -0.54854223 | H | 0.37316151  | 5.38674917  | 0.81812602  |
| H                                | 6.83055803  | 0.60907744  | 1.11269629  | C | -0.00738815 | 3.07121012  | -2.23644036 |
| C                                | -5.37323557 | -1.72087051 | -1.50428469 | C | -0.04804986 | 4.44922776  | -2.40904097 |
| H                                | -5.31036284 | -1.29641738 | -2.51026931 | H | 0.07513330  | 6.36561376  | -1.43003969 |
| H                                | -6.19800368 | -2.42968052 | -1.48564331 | H | -0.11885416 | 2.41214835  | -3.09195469 |
| H                                | -5.58909583 | -0.91894941 | -0.79010248 | H | -0.19182474 | 4.86633557  | -3.40026994 |
| C                                | -4.22674020 | -3.77939172 | -0.65378303 | C | 0.25543718  | 1.00682316  | -0.88835900 |
| H                                | -3.93087841 | -3.82707780 | 0.40017651  | C | 1.57328135  | 0.40968445  | -0.73986985 |
| H                                | -5.25293478 | -4.12852999 | -0.74163298 | C | -0.97609405 | 0.28311111  | -0.98437886 |
| H                                | -3.58602026 | -4.45061283 | -1.23370475 | C | 1.81795718  | -0.99008833 | -0.83456559 |
| F                                | -4.63786805 | -1.18008409 | 1.66285982  | C | 2.69268749  | 1.21539558  | -0.41825452 |
| -----                            |             |             |             | C | -1.05689537 | -1.14083293 | -1.11397698 |
| <b>3 (CT state)</b>              |             |             |             | C | -2.21723949 | 0.96575745  | -0.84727989 |
| Total Energy = -1922.6383623 A.U |             |             |             | C | 3.05625833  | -1.51756241 | -0.48769186 |
| -----                            |             |             |             | C | 3.91918146  | 0.68564893  | -0.07362862 |
|                                  |             |             |             | H | 2.60022690  | 2.29608010  | -0.43043344 |
|                                  |             |             |             | C | -2.27803456 | -1.79167215 | -1.00695224 |
|                                  |             |             |             | C | -3.42511407 | 0.30932912  | -0.75402050 |

|    |             |             |             |
|----|-------------|-------------|-------------|
| H  | -2.22457033 | 2.04936127  | -0.79074373 |
| C  | 4.12951633  | -0.71212789 | -0.04727195 |
| H  | 3.20046106  | -2.58940531 | -0.57104013 |
| H  | 4.72335289  | 1.36730526  | 0.17431501  |
| H  | -2.29362368 | -2.87240969 | -1.09911711 |
| C  | -3.49376787 | -1.10374054 | -0.78193921 |
| H  | -4.32329002 | 0.90074172  | -0.62638291 |
| Si | 0.49186284  | -2.07850483 | -1.56497987 |
| C  | 0.51707879  | -3.83321740 | -0.89933302 |
| H  | 0.38276384  | -3.87934740 | 0.18315628  |
| H  | -0.27887885 | -4.42566098 | -1.36250764 |
| H  | 1.46673752  | -4.31915171 | -1.14577403 |
| C  | 0.67625060  | -2.11833265 | -3.43728601 |
| H  | 1.62123590  | -2.59042647 | -3.72509674 |
| H  | -0.14195751 | -2.68206284 | -3.89706089 |
| H  | 0.66347210  | -1.10273387 | -3.84488719 |
| N  | 5.32092447  | -1.25349558 | 0.35980720  |
| N  | -4.67254481 | -1.77135757 | -0.59871052 |
| C  | 5.53463041  | -2.68440829 | 0.26444437  |
| H  | 6.51304929  | -2.92835630 | 0.67631156  |
| H  | 4.78290737  | -3.23500724 | 0.84093794  |
| H  | 5.50069197  | -3.04232844 | -0.77323023 |
| C  | 6.44031485  | -0.38545959 | 0.67069269  |
| H  | 7.28318772  | -0.99213187 | 0.99915068  |
| H  | 6.76158480  | 0.20489728  | -0.19756557 |
| H  | 6.19112846  | 0.30681812  | 1.48257176  |
| C  | -5.89225719 | -1.03125814 | -0.33626049 |
| H  | -6.15139368 | -0.36942957 | -1.17089578 |
| H  | -6.71408965 | -1.73177962 | -0.19679062 |
| H  | -5.80631208 | -0.42199030 | 0.57210019  |
| C  | -4.69267272 | -3.22194362 | -0.59689118 |
| H  | -4.02716529 | -3.63379777 | 0.17205610  |
| H  | -5.70408893 | -3.56621673 | -0.38697792 |
| H  | -4.38984220 | -3.63319278 | -1.56720063 |
| F  | -1.10548467 | -3.35626859 | 2.12319040  |

Total Energy = -1922.6188927 A.U

-----

|   |             |             |             |
|---|-------------|-------------|-------------|
| C | -3.57829097 | 1.93311683  | 0.89726757  |
| C | -2.40170493 | 2.65659784  | 1.05306804  |
| C | -1.20757525 | 1.99738126  | 1.33226643  |
| C | -1.18126932 | 0.60391506  | 1.42395464  |
| C | -2.34877427 | -0.12748735 | 1.27577207  |
| C | -3.53072734 | 0.55228715  | 1.01933251  |
| H | -4.52716718 | 2.42760796  | 0.72383170  |
| H | -2.40651630 | 3.73817243  | 0.99627352  |
| H | -0.25210222 | 0.09091506  | 1.64888740  |
| H | -2.35846070 | -1.20595592 | 1.37377882  |
| N | -0.03983074 | 2.75759883  | 1.63037586  |
| N | -0.16948847 | 3.57571484  | 2.69638561  |
| O | 0.83351596  | 4.09206494  | 3.02890217  |
| C | 1.23578526  | 2.49502964  | 0.99010322  |
| H | 1.46867221  | 1.43143561  | 1.06511588  |
| H | 1.95278318  | 3.04845586  | 1.60356290  |
| C | 1.26936058  | 2.98720353  | -0.43871203 |
| C | 1.37229183  | 4.36152017  | -0.66195256 |
| C | 1.21074985  | 2.11884899  | -1.53501062 |
| C | 1.42068248  | 4.87881013  | -1.95123155 |
| H | 1.41741251  | 5.02779541  | 0.19509971  |
| C | 1.28206364  | 2.64701041  | -2.82870397 |
| C | 1.38479872  | 4.01798225  | -3.04018233 |
| H | 1.49961547  | 5.94995647  | -2.10224123 |
| H | 1.25312690  | 1.96958975  | -3.67829820 |
| H | 1.44287287  | 4.40706147  | -4.05117769 |
| C | 1.05023249  | 0.64278237  | -1.35800627 |
| C | 2.15502105  | -0.14811868 | -0.93480105 |
| C | -0.20867702 | 0.03203454  | -1.73128916 |
| C | 2.09873828  | -1.60294074 | -0.75281712 |
| C | 3.38483590  | 0.51445844  | -0.53787700 |
| C | -0.47047922 | -1.41326246 | -1.71937214 |
| C | -1.30829062 | 0.87965795  | -2.08414826 |

-----

**3 (CT-MECI)**

|    |             |             |             |
|----|-------------|-------------|-------------|
| C  | 2.96537220  | -2.18548099 | 0.15818200  |
| C  | 4.23862223  | -0.09498978 | 0.30587628  |
| H  | 3.53667846  | 1.55267263  | -0.80421614 |
| C  | -1.76366720 | -1.87179650 | -1.64071020 |
| C  | -2.57802750 | 0.40093137  | -2.03867042 |
| H  | -1.15113726 | 1.94168998  | -2.21222736 |
| C  | 4.00655650  | -1.45872127 | 0.76285639  |
| H  | 2.94916596  | -3.26405681 | 0.27746818  |
| H  | 5.10046131  | 0.45054974  | 0.67068047  |
| H  | -1.95422610 | -2.93946199 | -1.68534508 |
| C  | -2.86091899 | -0.99515190 | -1.73901107 |
| H  | -3.40079879 | 1.09583843  | -2.14966570 |
| Si | 0.96284396  | -2.58801647 | -1.82424063 |
| C  | 0.54944056  | -4.25713496 | -1.06728094 |
| H  | 0.17998793  | -4.16354769 | -0.04219924 |
| H  | -0.20992296 | -4.78448012 | -1.65424481 |
| H  | 1.42512076  | -4.91520717 | -1.05523475 |
| C  | 1.60968676  | -2.81199609 | -3.56967756 |
| H  | 2.50814446  | -3.43790067 | -3.58109851 |
| H  | 0.86224742  | -3.29310066 | -4.20938006 |
| H  | 1.86924364  | -1.85259216 | -4.02641548 |
| N  | 4.88534613  | -2.03135278 | 1.61966729  |
| N  | -4.13587484 | -1.41387080 | -1.67343627 |
| C  | 4.57330725  | -3.30931980 | 2.23470204  |
| H  | 5.14830121  | -3.41819277 | 3.15511437  |
| H  | 3.51077292  | -3.35597332 | 2.48841544  |
| H  | 4.81618550  | -4.15210362 | 1.57249855  |
| C  | 6.17509616  | -1.42676309 | 1.93173212  |
| H  | 6.80034246  | -2.16617750 | 2.43137115  |
| H  | 6.69720800  | -1.11311811 | 1.02410661  |
| H  | 6.06474959  | -0.56508792 | 2.60224827  |
| C  | -5.26269404 | -0.62747537 | -2.16083068 |
| H  | -5.00005982 | -0.08068064 | -3.06693164 |
| H  | -6.07818739 | -1.30549810 | -2.41769840 |
| H  | -5.61514433 | 0.06397089  | -1.38707406 |

|   |             |             |             |
|---|-------------|-------------|-------------|
| C | -4.45496653 | -2.68467595 | -1.04788173 |
| H | -3.73747392 | -2.89817659 | -0.25242940 |
| H | -5.44794489 | -2.62018567 | -0.60016598 |
| H | -4.44477969 | -3.51080679 | -1.77101852 |
| F | -4.66556873 | -0.15462473 | 0.88229427  |

#### 4 (Ground state)

Total Energy = -2283.1022479 A.U

|   |             |             |             |
|---|-------------|-------------|-------------|
| C | 4.02702782  | 1.21078272  | -1.26274846 |
| C | 3.02202804  | 2.16939231  | -1.21116189 |
| C | 1.71491152  | 1.82877899  | -1.55376147 |
| C | 1.40345126  | 0.51874264  | -1.91495610 |
| C | 2.39886037  | -0.44824161 | -1.94597305 |
| C | 3.70466779  | -0.08900435 | -1.63237073 |
| H | 5.04654334  | 1.47346393  | -1.00639904 |
| H | 3.25304747  | 3.18369290  | -0.90898722 |
| H | 0.39205950  | 0.24412136  | -2.19251448 |
| H | 2.16067145  | -1.46803440 | -2.22391480 |
| N | 0.71006815  | 2.83889318  | -1.56486372 |
| N | 1.07054975  | 3.98636865  | -2.13550772 |
| O | 0.22645103  | 4.87250773  | -2.12795102 |
| C | -0.64234043 | 2.63051873  | -1.03560889 |
| H | -0.93631711 | 1.60629167  | -1.25896007 |
| H | -1.29425999 | 3.29812941  | -1.60054238 |
| C | -0.75919435 | 2.92395464  | 0.44664902  |
| C | -0.70723442 | 4.24859081  | 0.89014292  |
| C | -0.93850365 | 1.90220320  | 1.38930556  |
| C | -0.83600442 | 4.55836058  | 2.23804026  |
| H | -0.56740331 | 5.03692687  | 0.15838482  |
| C | -1.07600250 | 2.21893835  | 2.74378116  |
| C | -1.02670725 | 3.54031900  | 3.16859387  |
| H | -0.79410070 | 5.59314015  | 2.56071112  |
| H | -1.21606548 | 1.41839358  | 3.46309541  |
| H | -1.13493680 | 3.77241755  | 4.22258434  |

















|   |             |             |             |    |             |             |             |
|---|-------------|-------------|-------------|----|-------------|-------------|-------------|
| C | -3.24336822 | 2.00483322  | 1.28944620  | C  | 4.73271643  | -0.68823848 | 0.27773217  |
| C | -1.92833543 | 1.71884918  | 1.64263841  | H  | 3.85824390  | -2.63145843 | 0.67086422  |
| C | -1.57458994 | 0.42490670  | 2.02552432  | H  | 5.20763638  | 1.37271054  | -0.25516710 |
| C | -2.54253470 | -0.56746544 | 2.06478897  | H  | -1.65099531 | -3.47815980 | -0.50525358 |
| C | -3.87700211 | -0.29426935 | 1.74562746  | C  | -2.84318451 | -1.81539090 | -1.22012188 |
| H | -5.23308158 | 1.23832782  | 1.08572164  | H  | -3.67863998 | 0.08946963  | -1.87582367 |
| H | -3.50764142 | 3.00649375  | 0.97005252  | Si | 1.04247527  | -2.60824956 | 0.03812537  |
| H | -0.55356037 | 0.19164256  | 2.30870552  | C  | 0.70891128  | -3.05040959 | 1.82959026  |
| H | -2.25684590 | -1.57321805 | 2.35890750  | H  | 0.46759985  | -2.15807729 | 2.41445734  |
| N | -0.95589144 | 2.76435032  | 1.64321696  | H  | -0.13325947 | -3.74596227 | 1.90136485  |
| N | -1.33266173 | 3.89252503  | 2.23305434  | H  | 1.58457644  | -3.52757781 | 2.28031638  |
| O | -0.51867504 | 4.80955027  | 2.20308983  | C  | 1.49666771  | -4.11510109 | -0.97711828 |
| C | 0.38131591  | 2.60341873  | 1.06395037  | H  | 2.39752640  | -4.59155024 | -0.57794259 |
| H | 0.71890206  | 1.59094910  | 1.28025352  | H  | 0.68845564  | -4.85282782 | -0.95476354 |
| H | 1.03045853  | 3.29830805  | 1.59845226  | H  | 1.68479305  | -3.84229045 | -2.01905916 |
| C | 0.42642303  | 2.89087003  | -0.42298320 | N  | 5.97594400  | -1.02893745 | 0.66638538  |
| C | 0.26637019  | 4.20436219  | -0.87383833 | N  | -3.99125349 | -2.51056910 | -1.30204176 |
| C | 0.64071052  | 1.87482443  | -1.36397448 | C  | 6.26312711  | -2.38002918 | 1.13259727  |
| C | 0.32479462  | 4.50882630  | -2.22777388 | H  | 7.31866295  | -2.45105934 | 1.38548135  |
| H | 0.09809586  | 4.98789976  | -0.14268099 | H  | 5.67992744  | -2.62319322 | 2.02636224  |
| C | 0.70756793  | 2.18649795  | -2.72496898 | H  | 6.04749447  | -3.12072259 | 0.35622519  |
| C | 0.55225033  | 3.49716860  | -3.15729072 | C  | 7.05564635  | -0.05059855 | 0.62072342  |
| H | 0.19923423  | 5.53490523  | -2.55658351 | H  | 7.96885061  | -0.51116223 | 0.99130517  |
| H | 0.87553640  | 1.39017970  | -3.44299434 | H  | 7.23552216  | 0.29306440  | -0.40290153 |
| H | 0.60596869  | 3.72594021  | -4.21619562 | H  | 6.82979235  | 0.81535703  | 1.25055433  |
| C | 0.78194561  | 0.44018375  | -0.95103997 | C  | -5.22467027 | -1.84874499 | -1.71062189 |
| C | 2.08214471  | 0.01949148  | -0.53911494 | H  | -5.16645033 | -1.50476756 | -2.74819738 |
| C | -0.39806584 | -0.34523026 | -1.02352414 | H  | -6.05036337 | -2.55164329 | -1.62515370 |
| C | 2.38045044  | -1.30074850 | -0.07146365 | H  | -5.43845007 | -0.99257972 | -1.06414534 |
| C | 3.16260182  | 0.94703981  | -0.58184497 | C  | -4.01891247 | -3.93884050 | -1.00868817 |
| C | -0.45349890 | -1.73453882 | -0.67341600 | H  | -3.73986158 | -4.13741212 | 0.03142656  |
| C | -1.61857972 | 0.25982920  | -1.45149752 | H  | -5.02771236 | -4.31346654 | -1.16677049 |
| C | 3.65871732  | -1.62598250 | 0.31810512  | H  | -3.34077566 | -4.48948889 | -1.66728886 |
| C | 4.43292947  | 0.62017866  | -0.19346412 | C  | -4.92112378 | -1.37497110 | 1.84813514  |
| H | 2.98732247  | 1.95410844  | -0.94038822 | H  | -4.58631018 | -2.29352547 | 1.35853424  |
| C | -1.63205217 | -2.43040724 | -0.78295846 | H  | -5.12250067 | -1.62038027 | 2.89591222  |
| C | -2.78932287 | -0.43316278 | -1.55192113 | H  | -5.86439446 | -1.06671921 | 1.39118339  |
| H | -1.63371495 | 1.31191228  | -1.70509711 |    | -----       |             |             |

**6 ( $\pi$ - $\pi^*$  state)**

Total Energy = -1862.7433638 A.U

-----

|   |             |             |             |
|---|-------------|-------------|-------------|
| C | -2.32466400 | -1.32432200 | 2.26381700  |
| C | -2.13509500 | 0.04145000  | 2.12812900  |
| C | -0.84137700 | 0.57058800  | 2.12129700  |
| C | 0.24705200  | -0.28816300 | 2.24454100  |
| C | 0.03778300  | -1.66013800 | 2.35987900  |
| C | -1.24465600 | -2.20524300 | 2.37310600  |
| H | -3.33846500 | -1.71540600 | 2.26531500  |
| H | -2.98563900 | 0.70052000  | 2.01349500  |
| H | 1.26485100  | 0.08322600  | 2.25518800  |
| H | 0.90253800  | -2.31168500 | 2.44785400  |
| N | -0.66727800 | 1.98286500  | 1.99600000  |
| N | -1.66337400 | 2.72816000  | 2.46381600  |
| O | -1.48887900 | 3.93784700  | 2.37839300  |
| C | 0.55480300  | 2.63522900  | 1.51579000  |
| H | 1.34407700  | 1.88724400  | 1.50418900  |
| H | 0.82305900  | 3.39335200  | 2.25438100  |
| C | 0.43092000  | 3.28591800  | 0.14995500  |
| C | 0.41419900  | 4.67837600  | 0.05881100  |
| C | 0.39582800  | 2.52302200  | -1.03016000 |
| C | 0.36127300  | 5.31906500  | -1.17398800 |
| H | 0.43238500  | 5.26267200  | 0.97279200  |
| C | 0.33959200  | 3.17652200  | -2.26501600 |
| C | 0.32231400  | 4.56476900  | -2.34228500 |
| H | 0.34856600  | 6.40292500  | -1.22026400 |
| H | 0.31118900  | 2.57983800  | -3.17171000 |
| H | 0.28081200  | 5.05275500  | -3.31045000 |
| C | 0.40691100  | 1.02807800  | -1.01852800 |
| C | 1.66252400  | 0.36876800  | -0.83222000 |
| C | -0.85981100 | 0.36417400  | -1.12962500 |
| C | 1.83603100  | -1.06344700 | -0.86416100 |
| C | 2.83005900  | 1.14593100  | -0.52988600 |
| C | -1.01832100 | -1.06584400 | -1.22895500 |
| C | -2.06305600 | 1.14240300  | -1.08105000 |
| C | 3.02173300  | -1.62678900 | -0.44810700 |

|    |             |             |             |
|----|-------------|-------------|-------------|
| C  | 4.00266700  | 0.57799200  | -0.12489700 |
| H  | 2.77602300  | 2.22676500  | -0.58850000 |
| C  | -2.27043000 | -1.62995700 | -1.13565700 |
| C  | -3.30007600 | 0.57279000  | -1.00846600 |
| H  | -1.99337500 | 2.22294400  | -1.05619600 |
| C  | 4.13155300  | -0.84359400 | -0.01844400 |
| H  | 3.12235300  | -2.70592100 | -0.47390300 |
| H  | 4.83658500  | 1.22255200  | 0.12077400  |
| H  | -2.36212700 | -2.70827600 | -1.19790300 |
| C  | -3.45043100 | -0.84929900 | -0.97719900 |
| H  | -4.16755500 | 1.21617100  | -0.93857800 |
| Si | 0.47500000  | -2.13380500 | -1.55969700 |
| C  | 0.39540600  | -3.80838200 | -0.72541000 |
| H  | 0.39271300  | -3.70815300 | 0.36220200  |
| H  | -0.50550800 | -4.35397000 | -1.02371800 |
| H  | 1.25622700  | -4.42008700 | -1.01387000 |
| C  | 0.70911300  | -2.33822800 | -3.41366700 |
| H  | 1.63564300  | -2.88063400 | -3.62758300 |
| H  | -0.12435700 | -2.90138500 | -3.84585600 |
| H  | 0.75858300  | -1.36450900 | -3.91018300 |
| N  | 5.26786900  | -1.41162100 | 0.43390100  |
| N  | -4.66063600 | -1.42142200 | -0.81268300 |
| C  | 5.37347600  | -2.85941600 | 0.54699300  |
| H  | 6.32339800  | -3.11250800 | 1.01220800  |
| H  | 4.56665200  | -3.26051900 | 1.16829600  |
| H  | 5.33120900  | -3.33796900 | -0.43781300 |
| C  | 6.41450200  | -0.59125100 | 0.80137000  |
| H  | 7.22062700  | -1.23831400 | 1.13919600  |
| H  | 6.77452400  | -0.01017700 | -0.05390700 |
| H  | 6.16055200  | 0.09619200  | 1.61476800  |
| C  | -5.86005800 | -0.60290300 | -0.69727300 |
| H  | -5.99876100 | 0.01945700  | -1.58678600 |
| H  | -6.72597200 | -1.25317300 | -0.59696300 |
| H  | -5.80979500 | 0.04553100  | 0.18398500  |
| C  | -4.78529900 | -2.86894000 | -0.72269800 |
| H  | -4.14919300 | -3.26482400 | 0.07560400  |
| H  | -5.81802600 | -3.12513600 | -0.49766700 |
| H  | -4.50636200 | -3.35084000 | -1.66629000 |

|   |             |             |            |
|---|-------------|-------------|------------|
| C | -1.47400500 | -3.69032600 | 2.47059600 |
| H | -1.80481900 | -4.09479600 | 1.50756300 |
| H | -0.56105900 | -4.21872300 | 2.75625600 |
| H | -2.24933300 | -3.92353200 | 3.20590400 |

6 (CT state)

Total Energy = -1862.7424502 A.U

|   |             |             |             |
|---|-------------|-------------|-------------|
| C | 3.79454371  | 1.04483642  | -1.84459244 |
| C | 2.81621694  | 2.02968581  | -1.80555122 |
| C | 1.47990335  | 1.68352476  | -1.99944200 |
| C | 1.13013132  | 0.35123928  | -2.21178591 |
| C | 2.11902202  | -0.62311515 | -2.23423068 |
| C | 3.46462718  | -0.29746356 | -2.05683727 |
| H | 4.83295272  | 1.32288430  | -1.68901647 |
| H | 3.08062151  | 3.06409598  | -1.61862854 |
| H | 0.09487790  | 0.06893347  | -2.37117392 |
| H | 1.83564647  | -1.65903226 | -2.39231742 |
| N | 0.48056297  | 2.70105814  | -2.00070604 |
| N | 0.77950943  | 3.79442568  | -2.69151346 |
| O | -0.05197342 | 4.69536679  | -2.65412700 |
| C | -0.79187642 | 2.55967104  | -1.28412311 |
| H | -1.12378623 | 1.52834026  | -1.39367080 |
| H | -1.50338906 | 3.20636307  | -1.79851001 |
| C | -0.69309953 | 2.94631682  | 0.17681492  |
| C | -0.63430544 | 4.30125869  | 0.51800334  |
| C | -0.67602441 | 1.97976447  | 1.19496021  |
| C | -0.56549180 | 4.70321104  | 1.84587256  |
| H | -0.64413675 | 5.03917053  | -0.27738696 |
| C | -0.61879628 | 2.39791178  | 2.52969280  |
| C | -0.56258753 | 3.74668107  | 2.85789422  |
| H | -0.52124506 | 5.75936922  | 2.09020064  |
| H | -0.61135411 | 1.64641721  | 3.31331327  |
| H | -0.51739586 | 4.04910002  | 3.89889016  |
| C | -0.70527789 | 0.51231054  | 0.90456124  |
| C | -1.97825903 | -0.08742393 | 0.64433201  |
| C | 0.54755804  | -0.18489273 | 0.96024473  |

|    |             |             |             |
|----|-------------|-------------|-------------|
| C  | -2.17541233 | -1.48136737 | 0.33133079  |
| C  | -3.15689100 | 0.73172617  | 0.68882885  |
| C  | 0.70365514  | -1.60176986 | 0.74683813  |
| C  | 1.74376212  | 0.55579673  | 1.23637022  |
| C  | -3.44415915 | -1.96227367 | 0.08472248  |
| C  | -4.40540390 | 0.24428509  | 0.43869454  |
| H  | -3.05904797 | 1.78145138  | 0.93723727  |
| C  | 1.94894126  | -2.18535732 | 0.85135023  |
| C  | 2.96955431  | -0.03136631 | 1.33022870  |
| H  | 1.68327079  | 1.62822839  | 1.36814368  |
| C  | -4.60324135 | -1.13586182 | 0.12013434  |
| H  | -3.56442644 | -3.01467528 | -0.14804945 |
| H  | -5.24934530 | 0.91980710  | 0.49205666  |
| H  | 2.03897079  | -3.25287443 | 0.68168935  |
| C  | 3.12396948  | -1.44021440 | 1.14888172  |
| H  | 3.83005652  | 0.59206296  | 1.53390197  |
| Si | -0.73958477 | -2.67359147 | 0.24800365  |
| C  | -0.51561222 | -3.32673620 | -1.49981646 |
| H  | -0.46385327 | -2.50924903 | -2.22482161 |
| H  | 0.40496113  | -3.91471005 | -1.57713332 |
| H  | -1.35273732 | -3.97437276 | -1.77972279 |
| C  | -0.97678621 | -4.10710741 | 1.43649235  |
| H  | -1.85729094 | -4.69661831 | 1.16111786  |
| H  | -0.10967493 | -4.77521618 | 1.41452389  |
| H  | -1.10908803 | -3.75040603 | 2.46168591  |
| N  | -5.83370713 | -1.62812680 | -0.13056348 |
| N  | 4.33554586  | -2.02802501 | 1.24500908  |
| C  | -6.01536285 | -3.03990777 | -0.43826231 |
| H  | -7.07256497 | -3.23625077 | -0.60021946 |
| H  | -5.46867049 | -3.31789944 | -1.34550608 |
| H  | -5.66976642 | -3.66946633 | 0.38838086  |
| C  | -7.00264189 | -0.75896678 | -0.09384869 |
| H  | -7.88660724 | -1.34141981 | -0.34300829 |
| H  | -7.14256466 | -0.32853102 | 0.90325245  |
| H  | -6.91021744 | 0.05434513  | -0.82066412 |
| C  | 5.51687656  | -1.24134036 | 1.57149042  |
| H  | 5.42788936  | -0.78919948 | 2.56516427  |
| H  | 6.38959560  | -1.89018780 | 1.56376913  |

|   |            |             |             |
|---|------------|-------------|-------------|
| H | 5.67665430 | -0.44427690 | 0.83791325  |
| C | 4.47421719 | -3.46581669 | 1.06792126  |
| H | 4.14286866 | -3.77283509 | 0.07020267  |
| H | 5.52062470 | -3.74015046 | 1.17956195  |
| H | 3.88976786 | -4.01308883 | 1.81534174  |
| C | 4.52981354 | -1.36001644 | -2.12033104 |
| H | 5.32268847 | -1.17870697 | -1.39013370 |
| H | 4.11040188 | -2.35176350 | -1.93406835 |
| H | 4.99823295 | -1.38013758 | -3.11008036 |

## 6 (CT-MECI)

Total Energy = -1862.7396735 A.U

|   |             |             |             |
|---|-------------|-------------|-------------|
| C | 2.42318042  | -0.56879765 | -2.87059377 |
| C | 2.29984078  | 0.65396502  | -2.21622025 |
| C | 1.10412876  | 0.99431420  | -1.58667683 |
| C | 0.04044171  | 0.11230761  | -1.66937838 |
| C | 0.18035011  | -1.10648718 | -2.32968197 |
| C | 1.37371754  | -1.48205641 | -2.93044065 |
| H | 3.36086680  | -0.79539514 | -3.37422636 |
| H | 3.12875268  | 1.35369119  | -2.21126218 |
| H | -0.91499604 | 0.34084004  | -1.21290512 |
| H | -0.68075105 | -1.77495135 | -2.36466601 |
| N | 0.99965373  | 2.24151574  | -0.86524854 |
| N | 2.13184939  | 2.87450423  | -0.63837658 |
| O | 1.98575475  | 3.95724636  | -0.12604872 |
| C | -0.26016500 | 2.89452761  | -0.50443822 |
| H | -1.07223123 | 2.30279377  | -0.92770692 |
| H | -0.25852764 | 3.86830902  | -1.00526658 |
| C | -0.49321466 | 3.14390614  | 0.98213375  |
| C | -0.60558790 | 4.46847029  | 1.40971151  |
| C | -0.65007659 | 2.12290418  | 1.93370876  |
| C | -0.88388282 | 4.78800970  | 2.73068778  |
| H | -0.43588391 | 5.26434290  | 0.69100120  |
| C | -0.91687208 | 2.45202926  | 3.26920631  |

|    |             |             |             |
|----|-------------|-------------|-------------|
| C  | -1.04140403 | 3.77425559  | 3.66959523  |
| H  | -0.96295820 | 5.82869958  | 3.02751788  |
| H  | -1.03198151 | 1.65113173  | 3.99380973  |
| H  | -1.24745630 | 4.01274272  | 4.70788190  |
| C  | -0.55230989 | 0.68050639  | 1.58012974  |
| C  | -1.71523788 | -0.04978567 | 1.24724697  |
| C  | 0.72509687  | 0.02105459  | 1.61290607  |
| C  | -1.70641971 | -1.45450450 | 0.85811117  |
| C  | -2.96547547 | 0.65059028  | 1.09558554  |
| C  | 0.91853347  | -1.37882003 | 1.28175159  |
| C  | 1.90005533  | 0.80477974  | 1.82745885  |
| C  | -2.61367099 | -1.88599139 | -0.09912057 |
| C  | -3.87729024 | 0.19014609  | 0.20356848  |
| H  | -3.09194048 | 1.62244697  | 1.55996704  |
| C  | 2.10285986  | -1.77902979 | 0.69742864  |
| C  | 3.06632964  | 0.39780538  | 1.26805840  |
| H  | 1.81219301  | 1.81118504  | 2.22363065  |
| C  | -3.69077124 | -1.07139701 | -0.49796260 |
| H  | -2.59860406 | -2.92369392 | -0.41335847 |
| H  | -4.74885577 | 0.79492656  | -0.01304421 |
| H  | 2.24878022  | -2.82245354 | 0.43852225  |
| C  | 3.19568938  | -0.89300044 | 0.61344154  |
| H  | 3.89568136  | 1.09167807  | 1.24751693  |
| Si | -0.45502256 | -2.58261094 | 1.64217447  |
| C  | -0.24890082 | -4.15986935 | 0.65674300  |
| H  | -0.04574729 | -3.93686871 | -0.39531162 |
| H  | 0.57908247  | -4.76370671 | 1.04376275  |
| H  | -1.14308342 | -4.78989300 | 0.71292306  |
| C  | -0.73771069 | -2.88525611 | 3.46230130  |
| H  | -1.63418647 | -3.49089902 | 3.62874805  |
| H  | 0.11212440  | -3.41558512 | 3.90365031  |
| H  | -0.86124348 | -1.94440065 | 4.00451842  |
| N  | -4.60813162 | -1.47139212 | -1.40470030 |
| N  | 4.37686637  | -1.25033556 | 0.07440118  |
| C  | -4.35700375 | -2.65489592 | -2.20802976 |

|   |             |             |             |   |             |             |             |
|---|-------------|-------------|-------------|---|-------------|-------------|-------------|
| H | -5.01432057 | -2.64744161 | -3.07801146 | C | 1.06871958  | 2.64639243  | 0.98185194  |
| H | -3.32243772 | -2.65198549 | -2.56282377 | H | 1.30937107  | 1.61274521  | 1.22754026  |
| H | -4.53392877 | -3.58186552 | -1.64433530 | H | 1.83411117  | 3.28906512  | 1.41739627  |
| C | -5.91365698 | -0.82686828 | -1.51242963 | C | 0.99001483  | 2.86209283  | -0.51501807 |
| H | -6.54983736 | -1.42630542 | -2.16258912 | C | 0.92683571  | 4.17097764  | -1.00136427 |
| H | -6.40669434 | -0.75934848 | -0.53871448 | C | 0.96870981  | 1.79783132  | -1.42796157 |
| H | -5.83381401 | 0.17559762  | -1.94885476 | C | 0.86406991  | 4.42784291  | -2.36468726 |
| C | 5.59013035  | -0.46967368 | 0.29336391  | H | 0.93229273  | 4.99005118  | -0.28913565 |
| H | 5.74353704  | -0.26308254 | 1.35509280  | C | 0.91143658  | 2.06285920  | -2.80052089 |
| H | 6.44575143  | -1.04381612 | -0.05570899 | C | 0.86430945  | 3.36896215  | -3.26926125 |
| H | 5.56076278  | 0.47663335  | -0.25866470 | H | 0.82082004  | 5.45147273  | -2.72101279 |
| C | 4.47318858  | -2.47749001 | -0.69431890 | H | 0.90041835  | 1.23200119  | -3.49867357 |
| H | 3.61067641  | -2.56252676 | -1.36124644 | H | 0.82360158  | 3.55792612  | -4.33651682 |
| H | 5.37858693  | -2.45346280 | -1.30201596 | C | 1.00622875  | 0.36833034  | -0.97925008 |
| H | 4.51699073  | -3.36280435 | -0.04467718 | C | 2.27644762  | -0.13078724 | -0.55026095 |
| C | 1.53064040  | -2.81829428 | -3.61485933 | C | -0.21685022 | -0.34855332 | -1.05664751 |
| H | 1.91559929  | -3.58212079 | -2.92938542 | C | 2.47665588  | -1.43939669 | -0.00544030 |
| H | 0.57666368  | -3.18352565 | -4.00357798 | C | 3.42798899  | 0.69967167  | -0.66265983 |
| H | 2.22327987  | -2.75773996 | -4.45706512 | C | -0.34981188 | -1.73025618 | -0.69565065 |

## 7 (Ground state)

Total Energy = -1957.4647165 A.U

|   |             |             |            |
|---|-------------|-------------|------------|
| C | -3.63434154 | 1.72721717  | 1.05293319 |
| C | -2.54072530 | 2.57563587  | 1.12400437 |
| C | -1.31259070 | 2.10744658  | 1.58060855 |
| C | -1.19223030 | 0.77434887  | 1.96230341 |
| C | -2.27358811 | -0.08567561 | 1.87217787 |
| C | -3.52198036 | 0.36386840  | 1.39357000 |
| H | -4.57306984 | 2.12965715  | 0.69522528 |
| H | -2.63974466 | 3.61279335  | 0.82206504 |
| H | -0.24742518 | 0.39965683  | 2.34391497 |
| H | -2.13465763 | -1.11413253 | 2.17815588 |
| N | -0.18917608 | 2.98334014  | 1.65286286 |
| N | -0.38099376 | 4.14059616  | 2.26571948 |
| O | 0.55590391  | 4.93519999  | 2.22221559 |

|    |             |             |             |
|----|-------------|-------------|-------------|
| C  | 1.06871958  | 2.64639243  | 0.98185194  |
| H  | 1.30937107  | 1.61274521  | 1.22754026  |
| H  | 1.83411117  | 3.28906512  | 1.41739627  |
| C  | 0.99001483  | 2.86209283  | -0.51501807 |
| C  | 0.92683571  | 4.17097764  | -1.00136427 |
| C  | 0.96870981  | 1.79783132  | -1.42796157 |
| C  | 0.86406991  | 4.42784291  | -2.36468726 |
| H  | 0.93229273  | 4.99005118  | -0.28913565 |
| C  | 0.91143658  | 2.06285920  | -2.80052089 |
| C  | 0.86430945  | 3.36896215  | -3.26926125 |
| H  | 0.82082004  | 5.45147273  | -2.72101279 |
| H  | 0.90041835  | 1.23200119  | -3.49867357 |
| H  | 0.82360158  | 3.55792612  | -4.33651682 |
| C  | 1.00622875  | 0.36833034  | -0.97925008 |
| C  | 2.27644762  | -0.13078724 | -0.55026095 |
| C  | -0.21685022 | -0.34855332 | -1.05664751 |
| C  | 2.47665588  | -1.43939669 | -0.00544030 |
| C  | 3.42798899  | 0.69967167  | -0.66265983 |
| C  | -0.34981188 | -1.73025618 | -0.69565065 |
| C  | -1.39968425 | 0.30968065  | -1.51321235 |
| C  | 3.72758448  | -1.83648245 | 0.40762782  |
| C  | 4.67152355  | 0.30096490  | -0.25351808 |
| H  | 3.33444796  | 1.68681263  | -1.09857803 |
| C  | -1.54379492 | -2.38341675 | -0.87542053 |
| C  | -2.58761107 | -0.34076528 | -1.68177207 |
| H  | -1.37154787 | 1.36993582  | -1.72836456 |
| C  | 4.86965567  | -0.98829201 | 0.31288372  |
| H  | 3.85087573  | -2.83253166 | 0.81735040  |
| H  | 5.50317274  | 0.98185505  | -0.37591868 |
| H  | -1.61991745 | -3.42641326 | -0.58879316 |
| C  | -2.70058023 | -1.73073143 | -1.39761944 |
| H  | -3.44686557 | 0.22103350  | -2.02169326 |
| Si | 1.04703153  | -2.63851152 | 0.15736855  |
| C  | 0.59520960  | -2.89518137 | 1.95962724  |
| H  | 0.41351692  | -1.93966642 | 2.45965438  |
| H  | -0.31241609 | -3.50217861 | 2.03939254  |
| H  | 1.40003411  | -3.41120977 | 2.49207608  |
| C  | 1.43241333  | -4.26098425 | -0.69411930 |

|                                                      |             |             |             |   |             |             |             |
|------------------------------------------------------|-------------|-------------|-------------|---|-------------|-------------|-------------|
| H                                                    | 2.27444154  | -4.76222861 | -0.20675534 | C | -0.90320519 | 0.87242905  | 1.62923776  |
| H                                                    | 0.57084726  | -4.93443595 | -0.64802736 | C | -1.88816439 | -0.05579219 | 1.88055496  |
| H                                                    | 1.68837246  | -4.10094550 | -1.74493895 | C | -3.25625386 | 0.25068277  | 1.67617495  |
| N                                                    | 6.08332982  | -1.39512348 | 0.73244776  | H | -4.60091953 | 1.84576821  | 1.04131892  |
| N                                                    | -3.85023287 | -2.39920378 | -1.59026252 | H | -2.84379024 | 3.46201505  | 0.59224799  |
| C                                                    | 6.26574540  | -2.72847535 | 1.29224486  | H | 0.12721328  | 0.59782433  | 1.82095949  |
| H                                                    | 7.30900985  | -2.85548135 | 1.57291518  | H | -1.59189783 | -1.02496164 | 2.25501998  |
| H                                                    | 5.65168801  | -2.86934456 | 2.18723753  | N | -0.23739434 | 3.13762490  | 0.96708489  |
| H                                                    | 6.01119312  | -3.50359362 | 0.56237982  | N | -0.59320474 | 4.38092476  | 1.30788853  |
| C                                                    | 7.23617713  | -0.51068703 | 0.61864890  | O | 0.24759340  | 5.24452681  | 1.10746145  |
| H                                                    | 8.11006195  | -1.01092096 | 1.03038918  | C | 1.10132219  | 2.84349008  | 0.44103478  |
| H                                                    | 7.44399486  | -0.26222962 | -0.42710751 | H | 1.40496981  | 1.86716123  | 0.81454974  |
| H                                                    | 7.07820343  | 0.41665998  | 1.17783752  | H | 1.76678023  | 3.59409209  | 0.86789305  |
| C                                                    | -5.05036351 | -1.68957440 | -2.01433505 | C | 1.15856087  | 2.88513896  | -1.07200196 |
| H                                                    | -4.94070498 | -1.29207742 | -3.02838182 | C | 1.24979262  | 4.12189557  | -1.71766127 |
| H                                                    | -5.89330960 | -2.37710709 | -2.00165252 | C | 1.13597821  | 1.70680388  | -1.83599069 |
| H                                                    | -5.26692892 | -0.86929837 | -1.32585489 | C | 1.31732684  | 4.20261258  | -3.10312196 |
| C                                                    | -3.92491880 | -3.83765265 | -1.36569180 | H | 1.26640196  | 5.02510402  | -1.11726122 |
| H                                                    | -3.81667904 | -4.08627034 | -0.30454679 | C | 1.21231489  | 1.80282852  | -3.22993303 |
| H                                                    | -4.89447268 | -4.19793241 | -1.70294730 | C | 1.30006534  | 3.03659011  | -3.86350206 |
| H                                                    | -3.15122895 | -4.36195423 | -1.93307096 | H | 1.38841596  | 5.17151387  | -3.58617403 |
| C                                                    | -5.92942720 | 0.05521715  | 1.14664437  | H | 1.19757496  | 0.88950676  | -3.81693204 |
| H                                                    | -6.04521995 | 0.67577249  | 0.25249491  | H | 1.35795159  | 3.08649249  | -4.94592592 |
| H                                                    | -6.64735392 | -0.76135917 | 1.06868627  | C | 1.02952012  | 0.34829976  | -1.21923287 |
| H                                                    | -6.18902296 | 0.66476390  | 2.02328265  | C | 2.23291174  | -0.23148588 | -0.68336488 |
| C                                                    | -4.47322637 | -1.85859669 | 1.73055722  | C | -0.26183318 | -0.26404865 | -1.22642358 |
| H                                                    | -4.41295451 | -1.91247808 | 2.82736121  | C | 2.30643958  | -1.53651673 | -0.09559143 |
| H                                                    | -5.34057597 | -2.43235013 | 1.40158547  | C | 3.44465492  | 0.52206629  | -0.69959951 |
| H                                                    | -3.58454843 | -2.34203826 | 1.31509412  | C | -0.52824602 | -1.60181136 | -0.77374334 |
| N                                                    | -4.58943376 | -0.50109323 | 1.23372908  | C | -1.39556379 | 0.49169076  | -1.66859548 |
| -----                                                |             |             |             | C | 3.49042069  | -1.98635518 | 0.46433466  |
| <b>7 (<math>\pi</math>-<math>\pi^*</math> state)</b> |             |             |             | C | 4.61174784  | 0.06684487  | -0.14346360 |
| Total Energy = -1957.3714268 A.U                     |             |             |             | H | 3.45505776  | 1.49999047  | -1.16659599 |
| -----                                                |             |             |             | C | -1.82268035 | -2.08547000 | -0.75583644 |
| C                                                    | -3.57199044 | 1.55735512  | 1.21151529  | C | -2.67263064 | 0.00781404  | -1.62382246 |
| C                                                    | -2.58146668 | 2.47851447  | 0.96122754  | H | -1.24873148 | 1.49886681  | -2.03825029 |
| C                                                    | -1.23173740 | 2.15333586  | 1.16661738  | C | 4.67569472  | -1.20874466 | 0.48149179  |
|                                                      |             |             |             | H | 3.51109725  | -2.97955085 | 0.90071996  |

|    |             |             |             |
|----|-------------|-------------|-------------|
| H  | 5.48954558  | 0.69885122  | -0.19122404 |
| H  | -1.99165871 | -3.10225457 | -0.41498711 |
| C  | -2.94424935 | -1.30325527 | -1.14488555 |
| H  | -3.47576525 | 0.64418623  | -1.97112883 |
| Si | 0.84065523  | -2.69198325 | -0.13090831 |
| C  | 0.44114720  | -3.32641974 | 1.59348287  |
| H  | 0.33969742  | -2.50012299 | 2.30333507  |
| H  | -0.49241449 | -3.89884115 | 1.59487420  |
| H  | 1.23477476  | -3.98707407 | 1.95769944  |
| C  | 1.15922779  | -4.14681896 | -1.27776850 |
| H  | 1.99848257  | -4.74877244 | -0.91426348 |
| H  | 0.27827551  | -4.79482433 | -1.33262350 |
| H  | 1.39568960  | -3.80434391 | -2.28929022 |
| N  | 5.82155602  | -1.66247559 | 1.05379422  |
| N  | -4.21480900 | -1.78349085 | -1.05980009 |
| C  | 5.85956097  | -2.97480539 | 1.67626470  |
| H  | 6.85058136  | -3.14501090 | 2.09257320  |
| H  | 5.12986028  | -3.04998797 | 2.49036533  |
| H  | 5.65240876  | -3.76942094 | 0.95001899  |
| C  | 7.02504588  | -0.84786362 | 1.03260520  |
| H  | 7.82447810  | -1.37798772 | 1.54661382  |
| H  | 7.35408974  | -0.64530286 | 0.00694749  |
| H  | 6.86755912  | 0.10897647  | 1.54277041  |
| C  | -5.33130299 | -0.97071874 | -1.50743416 |
| H  | -5.35542219 | -0.86971337 | -2.60008938 |
| H  | -6.26234371 | -1.42980611 | -1.17784513 |
| H  | -5.27629622 | 0.03054597  | -1.07199047 |
| C  | -4.45287466 | -3.20141535 | -0.83923012 |
| H  | -4.04814684 | -3.53237789 | 0.12104071  |
| H  | -5.52595215 | -3.38283718 | -0.82682077 |
| H  | -4.00374413 | -3.81064277 | -1.63241694 |
| C  | -5.63001005 | -0.27462607 | 1.94616958  |
| H  | -5.94248218 | 0.14970438  | 0.98928566  |
| H  | -6.24164566 | -1.15506973 | 2.13193934  |
| H  | -5.82335276 | 0.46064455  | 2.73446030  |
| C  | -3.87052784 | -1.97734848 | 2.43417713  |
| H  | -3.48198828 | -1.92170755 | 3.45782024  |
| H  | -4.75030146 | -2.61817971 | 2.42916428  |

|   |             |             |            |
|---|-------------|-------------|------------|
| H | -3.10717791 | -2.43885190 | 1.80055096 |
| N | -4.22897674 | -0.66792975 | 1.92052741 |

-----

### 7 (CT state)

Total Energy = -1957.4026148 A.U

-----

|   |             |             |             |
|---|-------------|-------------|-------------|
| C | -3.19512236 | 0.60025674  | 1.89482199  |
| C | -2.38378206 | 1.69087908  | 1.86327128  |
| C | -0.96837004 | 1.54514251  | 1.84153206  |
| C | -0.41406548 | 0.24873615  | 1.90788824  |
| C | -1.22330536 | -0.85245026 | 1.92529967  |
| C | -2.64732872 | -0.72299177 | 1.89615818  |
| H | -4.26522266 | 0.74929873  | 1.88088872  |
| H | -2.81824748 | 2.67841694  | 1.81764971  |
| H | 0.65575374  | 0.09773776  | 1.93314482  |
| H | -0.76433008 | -1.82899971 | 1.97919897  |
| N | -0.16778247 | 2.67631934  | 1.78428550  |
| N | -0.78467408 | 3.83578243  | 2.15105397  |
| O | -0.07914505 | 4.81586481  | 2.10329223  |
| C | 1.24374878  | 2.70335413  | 1.37569707  |
| H | 1.66312925  | 1.71395853  | 1.53575171  |
| H | 1.74943235  | 3.39338971  | 2.05162935  |
| C | 1.41707784  | 3.15103317  | -0.06375765 |
| C | 1.75592128  | 4.48123900  | -0.32325450 |
| C | 1.26500683  | 2.25063422  | -1.13349457 |
| C | 1.92700616  | 4.93762309  | -1.62489312 |
| H | 1.88106151  | 5.16483756  | 0.50933703  |
| C | 1.43461973  | 2.72863629  | -2.43752890 |
| C | 1.75763635  | 4.05720540  | -2.68849295 |
| H | 2.19063719  | 5.97445443  | -1.80502413 |
| H | 1.31545275  | 2.03322091  | -3.26285661 |
| H | 1.88608179  | 4.39946583  | -3.71023395 |
| C | 0.96917637  | 0.79465549  | -0.95851181 |
| C | 2.08447856  | -0.05816813 | -0.54472516 |
| C | -0.34729618 | 0.35334620  | -1.23760626 |
| C | 2.01957202  | -1.47626958 | -0.51136872 |
| C | 3.30081093  | 0.51581650  | -0.11291077 |





|   |             |             |             |    |             |             |             |
|---|-------------|-------------|-------------|----|-------------|-------------|-------------|
| C | -2.64102945 | -0.76273173 | 2.06751891  | H  | 2.93175155  | -3.29326603 | 0.07567094  |
| H | -4.29702121 | 0.68849673  | 2.10916422  | H  | 5.22656711  | 0.25419482  | 0.79132813  |
| H | -2.91452547 | 2.63332296  | 1.90721764  | H  | -2.33598306 | -2.39564457 | -1.27211940 |
| H | 0.64577440  | 0.07712742  | 1.73660090  | C  | -3.14981652 | -0.40027266 | -1.27640990 |
| H | -0.72415104 | -1.84080806 | 2.04215040  | H  | -3.50231971 | 1.71247712  | -1.55779670 |
| N | -0.26850560 | 2.61269067  | 1.61175444  | Si | 0.58516864  | -2.27634571 | -1.32586674 |
| N | -1.04827348 | 3.88940943  | 1.77634761  | C  | 0.07740191  | -3.86369632 | -0.41425819 |
| O | -0.35393576 | 4.82275614  | 1.80114400  | H  | 0.03281898  | -3.72951122 | 0.67239213  |
| C | 1.17731625  | 2.73271763  | 1.32591470  | H  | -0.88526512 | -4.25328905 | -0.76576128 |
| H | 1.64768901  | 1.76911493  | 1.49869138  | H  | 0.81154535  | -4.65503730 | -0.59675456 |
| H | 1.58504291  | 3.44155302  | 2.05026843  | C  | 0.98123523  | -2.74067361 | -3.10053599 |
| C | 1.41160547  | 3.20497501  | -0.09704534 | H  | 1.81732704  | -3.44603211 | -3.14749780 |
| C | 1.80327898  | 4.52248512  | -0.32294517 | H  | 0.12012110  | -3.19847351 | -3.59886423 |
| C | 1.30090984  | 2.28596101  | -1.15903081 | H  | 1.26278250  | -1.84710973 | -3.66484418 |
| C | 2.05663428  | 4.97251194  | -1.61446208 | N  | 5.22783971  | -2.42736940 | 1.18906511  |
| H | 1.91870285  | 5.20852879  | 0.51071938  | N  | -4.53374358 | -0.81360315 | -1.22185753 |
| C | 1.56596377  | 2.76669952  | -2.44147302 | C  | 5.20889826  | -3.84907012 | 0.91062355  |
| C | 1.92522935  | 4.09120640  | -2.67924099 | H  | 6.06077422  | -4.32124489 | 1.40274105  |
| H | 2.35940697  | 6.00051469  | -1.78122736 | H  | 4.30636668  | -4.31258824 | 1.32045704  |
| H | 1.49109997  | 2.06649020  | -3.26847562 | H  | 5.25650355  | -4.08445526 | -0.16483106 |
| H | 2.11785827  | 4.42940668  | -3.69178897 | C  | 6.54851291  | -1.83161963 | 1.26723517  |
| C | 0.97794117  | 0.84057066  | -0.95505100 | H  | 7.24039893  | -2.55419696 | 1.70318982  |
| C | 2.08185374  | -0.03279697 | -0.50774727 | H  | 6.94440586  | -1.52191618 | 0.28707725  |
| C | -0.35630398 | 0.39619775  | -1.19604578 | H  | 6.54394731  | -0.95814094 | 1.92548530  |
| C | 2.00574481  | -1.44626638 | -0.47062262 | C  | -5.46728988 | 0.17488150  | -1.74912138 |
| C | 3.29768300  | 0.51358899  | -0.04916445 | H  | -5.25083289 | 0.46588451  | -2.78911068 |
| C | -0.75076755 | -0.98412058 | -1.23581461 | H  | -6.48064997 | -0.23153217 | -1.71049643 |
| C | -1.42883998 | 1.31947734  | -1.35086236 | H  | -5.45966679 | 1.08065660  | -1.13635472 |
| C | 3.04461857  | -2.21334147 | 0.08082422  | C  | -4.78527394 | -2.12881554 | -1.80470790 |
| C | 4.32362034  | -0.25684422 | 0.47846696  | H  | -4.31558159 | -2.91874581 | -1.21141051 |
| H | 3.47536768  | 1.58174468  | -0.13116055 | H  | -5.86046940 | -2.32245926 | -1.80104370 |
| C | -2.09584912 | -1.33510655 | -1.23263436 | H  | -4.41866381 | -2.22183671 | -2.83839702 |
| C | -2.76388917 | 0.93260388  | -1.41373208 | C  | -4.87333870 | -1.71683452 | 2.00353315  |
| H | -1.19993448 | 2.37473425  | -1.47501860 | H  | -5.11860908 | -1.25557656 | 1.04930310  |
| C | 4.21604063  | -1.65144616 | 0.59686596  | H  | -5.29118384 | -2.71757310 | 2.04367041  |

|   |             |             |            |
|---|-------------|-------------|------------|
| H | -5.25598914 | -1.15268394 | 2.85405961 |
| C | -2.81484413 | -3.17852430 | 2.03912333 |
| H | -2.09535833 | -3.31636276 | 2.84494761 |
| H | -3.61249919 | -3.90384908 | 2.16394318 |
| H | -2.34020229 | -3.32262935 | 1.07016268 |
| N | -3.39570240 | -1.82399305 | 2.08546629 |

**16**

Total Energy = -570.4446927 A.U

|   |             |             |             |
|---|-------------|-------------|-------------|
| C | -1.06920138 | -0.08316022 | -0.50324221 |
| C | 0.31901463  | -0.09698721 | -0.58348579 |
| C | 1.08579735  | 1.08809957  | -0.40361802 |
| C | 0.35231799  | 2.27863572  | -0.13858736 |
| C | -1.03631286 | 2.27523064  | -0.06143424 |
| C | -1.76706941 | 1.09556160  | -0.24244984 |
| H | -1.64018813 | -1.00472951 | -0.64461653 |
| H | 0.82606327  | -1.04120265 | -0.78935465 |
| H | 0.91868630  | 3.19661110  | 0.00231487  |
| H | -1.54137757 | 3.22156202  | 0.14485814  |
| N | 2.43236358  | 1.10916972  | -0.47517433 |
| N | 3.15493847  | 2.47513606  | -0.25718906 |
| O | 4.40063103  | 2.32213985  | -0.35733242 |
| C | 3.22301307  | -0.04225751 | -0.73626065 |
| H | 3.11253226  | -0.83399111 | 0.03421562  |
| H | 3.01306903  | -0.50333166 | -1.72413246 |
| H | 4.26053356  | 0.34247525  | -0.72255899 |
| C | -3.85367279 | 2.17117720  | 0.07499129  |
| H | -4.92142265 | 1.90745570  | 0.08450271  |
| H | -3.58966790 | 2.61459439  | 1.05542963  |
| H | -3.68639380 | 2.94326995  | -0.70183016 |
| O | -3.15089379 | 0.99509138  | -0.18371427 |

**17**

Total Energy = -548.2284253 A.U

|   |             |             |             |
|---|-------------|-------------|-------------|
| C | -1.08002989 | -0.19769715 | -0.36591108 |
| C | 0.28823060  | -0.15224044 | -0.53879458 |
| C | 1.02228387  | 1.05990451  | -0.33314100 |
| C | 0.26770859  | 2.21772071  | 0.05926492  |
| C | -1.09408682 | 2.14918064  | 0.22549931  |
| C | -1.81027593 | 0.94458505  | 0.01942466  |
| H | -1.61205041 | -1.13807221 | -0.53050521 |
| H | 0.81793748  | -1.05739616 | -0.83766684 |
| H | 0.81591185  | 3.14332855  | 0.21789973  |
| H | -1.64416830 | 3.04506362  | 0.52460836  |
| N | 2.34373178  | 1.14106774  | -0.49068967 |
| N | 3.04663065  | 2.52901107  | -0.23613411 |
| O | 4.27640722  | 2.42264028  | -0.42853468 |
| C | 3.16564786  | 0.04069014  | -0.87758249 |
| H | 3.13284481  | -0.79257797 | -0.15027966 |
| H | 2.90136034  | -0.35906977 | -1.87499119 |
| H | 4.18579028  | 0.46584447  | -0.90783410 |
| C | -3.22313814 | 0.88651947  | 0.19519058  |
| N | -4.37989671 | 0.83697987  | 0.33859020  |

**18**

Total Energy = -555.211406 A.U

|   |             |             |             |
|---|-------------|-------------|-------------|
| C | -1.08105082 | -0.20754689 | -0.29400759 |
| C | 0.29746295  | -0.15350429 | -0.50104763 |
| C | 1.02824053  | 1.05341659  | -0.31583180 |
| C | 0.28086450  | 2.20189151  | 0.09092173  |
| C | -1.08845074 | 2.13101136  | 0.29229182  |
| C | -1.76565007 | 0.92947241  | 0.10005721  |
| H | -1.62970349 | -1.14122176 | -0.43989038 |
| H | 0.82080683  | -1.05893882 | -0.81143116 |
| H | 0.82884138  | 3.13032309  | 0.23548783  |
| H | -1.65081657 | 3.01504676  | 0.60343235  |
| N | 2.35738991  | 1.14198790  | -0.50677181 |
| N | 3.04877688  | 2.53425256  | -0.26973112 |
| O | 4.28161199  | 2.43900574  | -0.48997367 |
| C | 3.16793669  | 0.04717857  | -0.91073982 |

|   |             |             |             |
|---|-------------|-------------|-------------|
| H | 3.16109548  | -0.79286569 | -0.18523624 |
| H | 2.88602125  | -0.36277299 | -1.90297289 |
| H | 4.18605628  | 0.47749990  | -0.96589880 |
| F | -3.11890545 | 0.87429871  | 0.30264998  |

**19**

Total Energy = -915.6080909 A.U

|    |             |             |             |
|----|-------------|-------------|-------------|
| C  | -1.08066211 | -0.20761124 | -0.30751991 |
| C  | 0.29489836  | -0.15452039 | -0.50716323 |
| C  | 1.02809011  | 1.05328473  | -0.31839900 |
| C  | 0.27819289  | 2.20335790  | 0.08546600  |
| C  | -1.08903631 | 2.13506933  | 0.28002249  |
| C  | -1.77481892 | 0.93162718  | 0.08502179  |
| H  | -1.61736505 | -1.14661115 | -0.45942600 |
| H  | 0.81768218  | -1.06114083 | -0.81494940 |
| H  | 0.82437573  | 3.13238674  | 0.23333234  |
| H  | -1.63998633 | 3.02645512  | 0.58836218  |
| N  | 2.35311534  | 1.14024457  | -0.50166906 |
| N  | 3.05227604  | 2.53979322  | -0.26118724 |
| O  | 4.28162331  | 2.43912965  | -0.47843164 |
| C  | 3.16793513  | 0.04577289  | -0.90306340 |
| H  | 3.15754030  | -0.79262561 | -0.17732725 |
| H  | 2.88992362  | -0.36152660 | -1.89638145 |
| H  | 4.18613130  | 0.47602206  | -0.95403391 |
| Cl | -3.52938805 | 0.85949532  | 0.33858760  |

**20**

Total Energy = -455.9843927 A.U

|   |             |             |             |
|---|-------------|-------------|-------------|
| C | -1.07480237 | -0.20261121 | -0.28799402 |
| C | 0.29993783  | -0.15249874 | -0.49801645 |
| C | 1.02955078  | 1.05794904  | -0.31326619 |
| C | 0.27865566  | 2.20457199  | 0.09526049  |
| C | -1.08804178 | 2.12161530  | 0.29573808  |
| C | -1.79640523 | 0.92386741  | 0.11068294  |

|   |             |             |             |
|---|-------------|-------------|-------------|
| H | -1.59493281 | -1.15425878 | -0.44191010 |
| H | 0.82790545  | -1.05564277 | -0.80940790 |
| H | 0.82379207  | 3.13492578  | 0.23987280  |
| H | -1.62707262 | 3.02250371  | 0.60848351  |
| N | 2.35695926  | 1.14555857  | -0.50637571 |
| N | 3.05566793  | 2.53302578  | -0.27175146 |
| O | 4.28813119  | 2.43233864  | -0.49523391 |
| C | 3.16563396  | 0.04799032  | -0.91152752 |
| H | 3.15712728  | -0.79051466 | -0.18511422 |
| H | 2.87956349  | -0.36114946 | -1.90222401 |
| H | 4.18433664  | 0.47571908  | -0.96899624 |
| H | -2.87547919 | 0.87509807  | 0.27313377  |

**21**

Total Energy = -495.2660511 A.U

|   |             |             |             |
|---|-------------|-------------|-------------|
| C | -1.06313948 | -0.18696828 | -0.34149920 |
| C | 0.32016421  | -0.15177698 | -0.50422037 |
| C | 1.04702594  | 1.06184756  | -0.35656947 |
| C | 0.28085538  | 2.22568729  | -0.03515613 |
| C | -1.09075659 | 2.15182746  | 0.11861096  |
| C | -1.80985770 | 0.95050160  | -0.02792925 |
| H | -1.57965600 | -1.14632730 | -0.46535767 |
| H | 0.85199743  | -1.07291738 | -0.74891633 |
| H | 0.82076763  | 3.16313044  | 0.08197055  |
| H | -1.63825777 | 3.06964733  | 0.36513624  |
| N | 2.38121451  | 1.14299679  | -0.50451512 |
| N | 3.06692721  | 2.54040526  | -0.31431021 |
| O | 4.30770467  | 2.43339946  | -0.48674937 |
| C | 3.20400678  | 0.02786536  | -0.82274845 |
| H | 3.16794135  | -0.77279584 | -0.05534468 |
| H | 2.95424120  | -0.43204246 | -1.80110835 |
| H | 4.22418314  | 0.45432002  | -0.86404400 |
| C | -3.30736266 | 0.90596323  | 0.14619414  |
| H | -3.62116585 | 1.23133128  | 1.15462298  |
| H | -3.83221661 | 1.55867170  | -0.57484569 |
| H | -3.69335406 | -0.11584160 | -0.00015174 |

---

## 22

Total Energy = -589.8475709 A.U

---

|   |             |             |             |
|---|-------------|-------------|-------------|
| C | -0.96581962 | -0.25397236 | -0.09686664 |
| C | 0.42391211  | -0.19846890 | -0.13219923 |
| C | 1.10446520  | 0.99948368  | -0.49512762 |
| C | 0.28631788  | 2.12832834  | -0.81712609 |
| C | -1.09272582 | 2.04096238  | -0.77249652 |
| C | -1.75396117 | 0.85245473  | -0.41268426 |
| H | -1.47119183 | -1.18273948 | 0.18418260  |
| H | 1.00068574  | -1.08907643 | 0.12286507  |
| H | 0.79130666  | 3.05060631  | -1.09625650 |
| H | -1.68303761 | 2.92847793  | -1.02640071 |
| N | -3.19295753 | 0.74023880  | -0.35983723 |
| N | 2.44348388  | 1.09477648  | -0.54152496 |
| N | 3.08142991  | 2.47335840  | -0.95683990 |
| O | 4.33342072  | 2.38160792  | -0.94753236 |
| C | 3.31836576  | 0.01619965  | -0.23538166 |
| H | 3.21269731  | -0.34708517 | 0.80743113  |
| H | 3.18861635  | -0.85421447 | -0.91074274 |
| H | 4.32868325  | 0.44451775  | -0.37594991 |
| C | -3.79864970 | 1.58633627  | 0.64838206  |
| H | -4.87097270 | 1.34091913  | 0.75213601  |
| H | -3.30746345 | 1.41165649  | 1.61645234  |
| H | -3.72647549 | 2.67563762  | 0.42328919  |
| C | -3.83025984 | 0.90832100  | -1.65011789 |
| H | -3.36218426 | 0.23288655  | -2.38061255 |
| H | -4.90293066 | 0.65355150  | -1.57701568 |
| H | -3.76087597 | 1.94495059  | -2.05391822 |

---

## Reference

1. R.L. Collin, W.N. Lipscomb, *Acta Crystallographica*, 4, 10–14 (1951).
